# Supplementary material for: Proteomic Analysis of Proteins Surrounding Occludin and Claudin-4 Reveals Their Proximity to Signaling and Trafficking Networks
Source: PLoS One. 2015 Mar 19;10(3):e0117074. doi: 10.1371/journal.pone.0117074 (PMC4366163; doi:10.1371/journal.pone.0117074)
Supplement: S2 Table — Numbers in the columns for biotin ligase constructs are average normalized PSM/OPNx1000. Ribosomal proteins can be found below each column respectively. (XLSX) [file pone.0117074.s006.xlsx]

## Sheet: Sheet1
Table S2. All proteins identified around BL-Ocln, Ocln-BL and BL-Cldn4.
Rank	Accession	All proteins identified with BL-Occludin	av n-PSM/OPN		Rank	Accession	All proteins identified with Occludin-BL	a-N-PSM/OPN		Rank	Accession	All proteins identified with BL-Claudin-4	a-N-PSM/OPN
1	50978954	occludin	252.213		1	345797882	transgelin-2	144.839		1	345800559	vesicle-associated membrane protein 2	101.376
2	345797882	transgelin-2	128.83		2	50978954	occludin	99.4209		2	345797882	transgelin-2	67.3885
3	345806493	synaptobrevin homolog YKT6-like	60.5821		3	345800559	vesicle-associated membrane protein 2	63.1337		3	73980912	vesicle-associated membrane protein 5	64.6485
4	345800559	vesicle-associated membrane protein 2	57.9726		4	345795763	PDZ and LIM domain protein 5 isoform 11	62.3255		4	345806493	synaptobrevin homolog YKT6-like	63.4011
5	73980912	vesicle-associated membrane protein 5	38.1385		5	345792440	PDZ and LIM domain protein 1	48.6271		5	308081450	CD44 antigen precursor	57.8613
6	345794237	plasmolipin	37.9205		6	345805020	adapter molecule crk isoform 2	38.6055		6	50979156	ras-related protein Rab-7a	56.6657
7	345799449	clathrin interactor 1 isoform 3	33.7592		7	345805018	adapter molecule crk isoform 1	32.9973		7	57108129	synaptosomal-associated protein 23 isoform 2	56.4209
8	345805020	adapter molecule crk isoform 2	30.6846		8	345799292	adipose most abundant gene transcript 2 protein	32.6926		8	345795509	coxsackievirus and adenovirus receptor homolog	47.1603
9	345807298	SLIT and NTRK-like family, member 4 isoform 2	29.6425		9	57098823	protein S100-A11-like	32.0398		9	345793345	integrin beta-1	43.6024
10	345795509	coxsackievirus and adenovirus receptor homolog	28.2433		10	50978966	tight junction protein ZO-2	30.4913		10	73982228	catenin delta-1 isoform 4	40.3416
11	345799451	clathrin interactor 1 isoform 1	27.5817		11	345799451	clathrin interactor 1 isoform 1	29.0929		11	50978770	claudin-3	36.6352
12	345779489	protein NDRG1	27.1767		12	55741803	tight junction protein ZO-1	28.6182		12	345794237	plasmolipin	35.262
13	73998757	pleckstrin homology domain-containing family A member 1 isoform 5	26.0081		13	345806493	synaptobrevin homolog YKT6-like	26.4109		13	73983790	4F2 cell-surface antigen heavy chain	35.1722
14	345805018	adapter molecule crk isoform 1	24.7742		14	73950745	EF-hand domain-containing protein D2	24.4591		14	147898773	carcinoembryonic antigen-related cell adhesion molecule 1 precursor	34.4726
15	359318941	acyl-protein thioesterase 2-like	24.1322		15	345799052	PDZ and LIM domain protein 7	24.3827		15	345799149	integrin alpha-2	32.5642
16	73962894	mitogen-activated protein kinase kinase kinase kinase 5 isoform 2	23.2791		16	73963922	mitogen-activated protein kinase 1 interacting protein 1-like	23.8052		16	73987612	basigin	28.2429
17	73995130	polyubiquitin-C isoform 2	22.1483		17	359321818	neuroblast differentiation-associated protein AHNAK	23.318		17	345799451	clathrin interactor 1 isoform 1	27.9436
18	359321818	neuroblast differentiation-associated protein AHNAK	20.5367		18	345807298	SLIT and NTRK-like family, member 4 isoform 2	23.3081		18	73950452	MARCKS-related protein	27.351
19	57098823	protein S100-A11-like	20.3416		19	73982676	src substrate cortactin isoform 1	23.0968		19	74003604	claudin-1	25.6901
20	345795763	PDZ and LIM domain protein 5 isoform 11	20.1879		20	73998757	pleckstrin homology domain-containing family A member 1 isoform 5	22.3327		20	50979052	annexin A13	25.4994
21	57108129	synaptosomal-associated protein 23 isoform 2	19.3084		21	359318941	acyl-protein thioesterase 2-like	21.5154		21	345779489	protein NDRG1	24.5606
22	73982676	src substrate cortactin isoform 1	18.9785		22	345790631	arf-GAP domain and FG repeats-containing protein 1 isoform 1	21.2211		22	345804801	brain-specific angiogenesis inhibitor 1-associated protein 2 isoform 2	24.4272
23	50978966	tight junction protein ZO-2	18.7868		23	73982819	coronin-1B isoform 1	21.1156		23	73947234	neutral amino acid transporter B(0) isoform 1	23.3653
24	50978674	superoxide dismutase [Cu-Zn]	18.4603		24	73995130	polyubiquitin-C isoform 2	20.9578		24	345792359	epidermal growth factor receptor kinase substrate 8 isoform 1	22.5421
25	345790631	arf-GAP domain and FG repeats-containing protein 1 isoform 1	17.2084		25	73980912	vesicle-associated membrane protein 5	20.9213		25	359318941	acyl-protein thioesterase 2-like	21.91
26	55741803	tight junction protein ZO-1	17.141		26	73949154	USP6 N-terminal like	20.8941		26	50978954	occludin	21.351
27	73982819	coronin-1B isoform 1	16.9784		27	73962894	mitogen-activated protein kinase kinase kinase kinase 5 isoform 2	20.4977		27	345807298	SLIT and NTRK-like family, member 4 isoform 2	21.1379
28	73950745	EF-hand domain-containing protein D2	16.5559		28	73946797	annexin A1	19.8857		28	345796449	claudin-16	20.769
29	73949154	USP6 N-terminal like	16.544		29	345795509	coxsackievirus and adenovirus receptor homolog	19.3089		29	359321818	neuroblast differentiation-associated protein AHNAK	18.817
30	68158924	UDP-galactose translocator	16.1651		30	50978674	superoxide dismutase [Cu-Zn]	18.7124		30	66472883	podocalyxin precursor	17.4778
31	359321812	serine/threonine-protein kinase MARK2 isoform 2	16.1116		31	345779038	oxidation resistance protein 1	18.3801		31	73947369	poliovirus receptor-related protein 2 isoform 2	17.0871
32	345796449	claudin-16	16.1053		32	345779489	protein NDRG1	18.2777		32	73992599	breast carcinoma-amplified sequence 1	16.4907
33	73955431	eukaryotic translation initiation factor 5A-1 isoform 2	16.0403		33	73996013	synaptosomal-associated protein 29	17.511		33	345780352	septin-7 isoform 1	16.261
34	73953687	casein kinase I isoform alpha isoform 1	15.6304		34	73966152	LIM and SH3 domain protein 1 isoform 2	17.0053		34	73967439	tubulin beta-2C chain isoform 1	16.2055
35	73996013	synaptosomal-associated protein 29	15.2156		35	73981482	membrane-associated guanylate kinase, WW and PDZ domain-containing protein 3 isoform 2	15.6184		35	55741705	ras-related protein Rab-1A	16.0915
36	50978770	claudin-3	15.2097		36	359321812	serine/threonine-protein kinase MARK2 isoform 2	14.9982		36	73996013	synaptosomal-associated protein 29	16.0347
37	345799292	adipose most abundant gene transcript 2 protein	14.539		37	308199425	elongation factor 1-alpha 1	14.9604		37	345800139	claudin-7	15.9083
38	74003604	claudin-1	14.3875		38	345792359	epidermal growth factor receptor kinase substrate 8 isoform 1	14.9114		38	73998466	STE20-like kinase isoform 1	15.8555
39	73983790	4F2 cell-surface antigen heavy chain	13.9897		39	57108129	synaptosomal-associated protein 23 isoform 2	14.5944		39	73946797	annexin A1	15.8456
40	73963922	mitogen-activated protein kinase 1 interacting protein 1-like	13.7898		40	73982228	catenin delta-1 isoform 4	14.3987		40	359319613	claudin-4-like	15.5754
41	308081450	CD44 antigen precursor	13.6324		41	73958089	28 kDa heat- and acid-stable phosphoprotein	13.9786		41	147904030	carcinoembryonic antigen-related cell adhesion molecule 28 precursor	15.2726
42	73982228	catenin delta-1 isoform 4	12.7861		42	73995905	v-crk sarcoma virus CT10 oncogene homolog (avian)-like isoform 1	13.6846		42	74010356	synaptobrevin homolog YKT6-like	15.1836
43	73964085	MAP/microtubule affinity-regulating kinase 3 isoform 5	12.7254		43	345794237	plasmolipin	12.1901		43	345789091	sodium bicarbonate cotransporter 3	14.7439
44	73946797	annexin A1	12.5466		44	73955431	eukaryotic translation initiation factor 5A-1 isoform 2	11.948		44	345804799	brain-specific angiogenesis inhibitor 1-associated protein 2 isoform 1	13.8829
45	345800829	WW domain-containing oxidoreductase	12.3647		45	345793056	syntenin-1 isoform 2	11.8229		45	345807425	ephrin-B1	13.8648
46	73964123	MAP/microtubule affinity-regulating kinase 3 isoform 23	12.0437		46	345799029	gamma-synuclein	11.5073		46	73981117	vang-like protein 1 isoform 1	13.6094
47	345792359	epidermal growth factor receptor kinase substrate 8 isoform 1	11.4044		47	345800829	WW domain-containing oxidoreductase	11.1024		47	73949154	USP6 N-terminal like	13.4057
48	345799029	gamma-synuclein	11.4042		48	73961676	protein S100-A6 isoform 2	10.1533		48	68158924	UDP-galactose translocator	13.3695
49	354548804	ADP-ribosylation factor 1	11.1634		49	50950235	receptor-binding cancer antigen expressed on SiSo cells	9.9179		49	359320122	fermitin family homolog 2	13.2269
50	73981482	membrane-associated guanylate kinase, WW and PDZ domain-containing protein 3 isoform 2	11.1574		50	73965920	junction plakoglobin isoform 10	9.78491		50	345805020	adapter molecule crk isoform 2	12.9928
51	50978772	claudin-2	10.8732		51	73964085	MAP/microtubule affinity-regulating kinase 3 isoform 5	9.70375		51	73973432	ras-related protein Rab-23	12.3732
52	57093423	poly(rC)-binding protein 1 isoform 1	10.8317		52	114326335	palmitoyltransferase ZDHHC5	9.61038		52	359320259	Na(+)/H(+) exchange regulatory cofactor NHE-RF1	12.1708
53	73980368	vesicle-associated membrane protein 8 isoform 2	10.7624		53	57093423	poly(rC)-binding protein 1 isoform 1	9.6006		53	73999120	tyrosine-protein kinase Lyn isoform 1	12.0804
54	73958089	28 kDa heat- and acid-stable phosphoprotein	10.7583		54	359320259	Na(+)/H(+) exchange regulatory cofactor NHE-RF1	9.53309		54	73998757	pleckstrin homology domain-containing family A member 1 isoform 5	11.5666
55	114326335	palmitoyltransferase ZDHHC5	10.6655		55	345784504	afadin	9.21242		55	345800504	myb-binding protein 1A isoform 4	11.5384
56	73966152	LIM and SH3 domain protein 1 isoform 2	10.5966		56	356991175	uncharacterized protein LOC100846982	9.17845		56	50979136	sodium/potassium-transporting ATPase subunit alpha-1 precursor	11.2551
57	359320122	fermitin family homolog 2	10.5671		57	57109526	transgelin-3	8.82892		57	359320726	solute carrier family 12 member 2, partial	10.942
58	345784434	thioredoxin-like 1	10.2333		58	73953687	casein kinase I isoform alpha isoform 1	8.75319		58	345781192	ephrin type-A receptor 1	10.6296
59	345804799	brain-specific angiogenesis inhibitor 1-associated protein 2 isoform 1	10.1919		59	68158924	UDP-galactose translocator	8.70713		59	345778644	tubulin beta chain	10.6125
60	345792440	PDZ and LIM domain protein 1	10.1237		60	73987780	phosphatidylinositol-binding clathrin assembly protein isoform 4	8.57513		60	50950177	annexin A2	10.5241
61	345780352	septin-7 isoform 1	10.1104		61	345782253	mitogen-activated protein kinase kinase kinase kinase 3 isoform 1	8.46388		61	73995130	polyubiquitin-C isoform 2	10.4318
62	359321653	rab11 family-interacting protein 5-like	10.0906		62	73981117	vang-like protein 1 isoform 1	8.42807		62	50978890	integrin beta-3 precursor	10.2499
63	73995905	v-crk sarcoma virus CT10 oncogene homolog (avian)-like isoform 1	10.0571		63	345777291	calmodulin isoform 2	8.22414		63	359321812	serine/threonine-protein kinase MARK2 isoform 2	10.2484
64	57092749	active regulator of SIRT1	9.68864		64	356460954	chloride intracellular channel protein 1	8.22401		64	345799029	gamma-synuclein	10.2338
65	57090551	ADP-ribosylation factor 6	9.59866		65	73962054	vesicle-associated membrane protein-associated protein A isoform 2	8.21687		65	345786729	guanine nucleotide-binding protein-like 3	10.2155
66	55741705	ras-related protein Rab-1A	9.59368		66	73964123	MAP/microtubule affinity-regulating kinase 3 isoform 23	8.17758		66	345802848	membrane cofactor protein	10.1356
67	359320638	mitogen-activated protein kinase kinase kinase kinase 4 isoform 2	9.40701		67	354548804	ADP-ribosylation factor 1	8.09154		67	345784434	thioredoxin-like 1	9.86807
68	308199425	elongation factor 1-alpha 1	9.31936		68	345805828	putative GTP-binding protein Parf	8.05323		68	345797117	Golgi reassembly-stacking protein 2	9.70997
69	345804750	septin-9	9.07154		69	359324076	coiled-coil domain-containing protein 25-like	7.97594		69	50950163	band 4.1-like protein 5	9.6879
70	359324088	emerin-like	8.96808		70	359322181	membrane-associated guanylate kinase, WW and PDZ domain-containing protein 1	7.93437		70	50979026	tyrosine-protein kinase Yes	9.68104
71	359319518	segment polarity protein dishevelled homolog DVL-1-like	8.6304		71	73964067	eukaryotic translation initiation factor 5 isoform 4	7.68334		71	73982819	coronin-1B isoform 1	9.61396
72	73962054	vesicle-associated membrane protein-associated protein A isoform 2	8.60563		72	359319882	ladinin-1	7.64398		72	74003992	tubulin beta-2A chain	9.43962
73	345804801	brain-specific angiogenesis inhibitor 1-associated protein 2 isoform 2	8.56971		73	274326247	testin	7.62571		73	73958089	28 kDa heat- and acid-stable phosphoprotein	9.34942
74	73981117	vang-like protein 1 isoform 1	8.56437		74	359319808	hematological and neurological expressed 1-like protein-like	7.6109		74	345801304	BAI1-associated protein 2-like 1 isoform 1	9.25332
75	359319512	ubiquitin-like protein ISG15-like	8.55123		75	345781540	rab11 family-interacting protein 1	7.56592		75	345776847	cdc42 effector protein 1	9.21743
76	50979156	ras-related protein Rab-7a	8.49456		76	74010709	drebrin-like isoform 2	7.5556		76	73965920	junction plakoglobin isoform 10	9.08899
77	73965920	junction plakoglobin isoform 10	8.45377		77	359320638	mitogen-activated protein kinase kinase kinase kinase 4 isoform 2	7.48169		77	50979327	equilibrative nucleoside transporter 1	8.99715
78	57109526	transgelin-3	8.28201		78	345780352	septin-7 isoform 1	7.47252		78	50978674	superoxide dismutase [Cu-Zn]	8.98641
79	73998466	STE20-like kinase isoform 1	8.2138		79	73992635	vesicle-associated membrane protein-associated protein B	7.45791		79	50978772	claudin-2	8.84968
80	73979203	rab11 family-interacting protein 1 isoform 1	8.17844		80	74010705	drebrin-like isoform 7	7.40724		80	73946134	A-kinase anchor protein 12	8.74492
81	345792339	pleckstrin homology domain-containing family A member 5	8.17537		81	308081450	CD44 antigen precursor	7.40497		81	345803763	leucine-rich repeat transmembrane protein FLRT2	8.56356
82	74006742	ATP-dependent RNA helicase DDX3X isoform 11	8.12562		82	345804799	brain-specific angiogenesis inhibitor 1-associated protein 2 isoform 1	7.38489		82	73948978	vimentin isoform 12	8.52619
83	73992635	vesicle-associated membrane protein-associated protein B	8.08759		83	73980368	vesicle-associated membrane protein 8 isoform 2	7.35182		83	73954046	serine/threonine-protein kinase 10	8.49636
84	57093665	bis(5'-nucleosyl)-tetraphosphatase [asymmetrical]	8.00563		84	73952670	ankyrin-3 isoform 1	7.18405		84	73964747	rho GDP-dissociation inhibitor 1 isoform 2	8.4305
85	73987780	phosphatidylinositol-binding clathrin assembly protein isoform 4	7.92544		85	50979218	protein 4.1	7.04232		85	345798663	secretory carrier-associated membrane protein 1 isoform 2	8.41666
86	345782253	mitogen-activated protein kinase kinase kinase kinase 3 isoform 1	7.8938		86	345792774	collagen alpha-1(XVII) chain	7.01114		86	50979218	protein 4.1	8.39351
87	345790319	probable palmitoyltransferase ZDHHC20 isoform 1	7.79393		87	345778644	tubulin beta chain	6.94647		87	73950854	ephrin type-A receptor 2 isoform 1	8.32212
88	73954046	serine/threonine-protein kinase 10	7.77601		88	50950163	band 4.1-like protein 5	6.93195		88	359322436	ras-related protein Rab-6A	8.19841
89	345776847	cdc42 effector protein 1	7.70194		89	73983142	Finkel-Biskis-Reilly murine sarcoma virus (FBR-MuSV) ubiquitously expressed isoform 2	6.87984		89	345790319	probable palmitoyltransferase ZDHHC20 isoform 1	8.1379
90	73985218	ADP-ribosylation factor 4 isoform 2	7.64965		90	73993916	coiled-coil domain-containing protein 25	6.83289		90	73991940	proto-oncogene tyrosine-protein kinase Src isoform 5	7.70377
91	359323129	tubulin alpha-1C chain-like	7.63379		91	345801654	calponin-3	6.82697		91	345804148	WD repeat-containing protein 20 isoform 6	7.67101
92	359320259	Na(+)/H(+) exchange regulatory cofactor NHE-RF1	7.54053		92	307938303	actin, cytoplasmic 1	6.78126		92	345800726	large neutral amino acids transporter small subunit 1 isoform 2	7.61595
93	359319430	misshapen-like kinase 1	7.49664		93	73997796	tubby-related protein 3	6.765		93	359320868	sorting nexin-3 isoform 2	7.54229
94	326633230	ubiquitin-conjugating enzyme E2 variant 1	7.46247		94	345802512	cysteine and glycine-rich protein 1 isoform 1	6.59452		94	345799449	clathrin interactor 1 isoform 3	7.43883
95	345803763	leucine-rich repeat transmembrane protein FLRT2	7.36024		95	359320108	cysteine-rich protein 2	6.59101		95	307938303	actin, cytoplasmic 1	7.37408
96	50950235	receptor-binding cancer antigen expressed on SiSo cells	7.19375		96	73986278	dnaJ homolog subfamily B member 1 isoform 2	6.55974		96	304376299	sodium/myo-inositol cotransporter	7.18942
97	50950163	band 4.1-like protein 5	7.15685		97	359321653	rab11 family-interacting protein 5-like	6.49359		97	345776969	protein FAM83F	7.13981
98	147898773	carcinoembryonic antigen-related cell adhesion molecule 1 precursor	7.12996		98	345793444	sickle tail protein homolog isoform 1	6.47418		98	359318970	protocadherin-1-like isoform 2	7.11369
99	73973432	ras-related protein Rab-23	7.11722		99	345784160	GRB2-associated-binding protein 1	6.46177		99	50950235	receptor-binding cancer antigen expressed on SiSo cells	6.97128
100	57095986	BET1 homolog	7.05234		100	74005537	tubulin alpha-4A chain isoform 1	6.43237		100	345792156	tubulin alpha-1A chain isoform 10	6.85468
101	73992599	breast carcinoma-amplified sequence 1	7.01904		101	359322116	tubulin beta-4 chain-like	6.33886		101	274326247	testin	6.83605
102	345799948	uncharacterized protein C11orf52	7.0076		102	57090551	ADP-ribosylation factor 6	6.19282		102	73997796	tubby-related protein 3	6.8347
103	345800726	large neutral amino acids transporter small subunit 1 isoform 2	6.99464		103	74003604	claudin-1	6.17707		103	73980368	vesicle-associated membrane protein 8 isoform 2	6.80265
104	359323234	ADP-ribosylation factor-like protein 3-like	6.95551		104	359324088	emerin-like	6.09286		104	354548804	ADP-ribosylation factor 1	6.74663
105	74006722	ATP-dependent RNA helicase DDX3X isoform 3	6.94787		105	345792339	pleckstrin homology domain-containing family A member 5	6.00875		105	73982676	src substrate cortactin isoform 1	6.54089
106	74004342	plakophilin-4 isoform 2	6.82037		106	74006742	ATP-dependent RNA helicase DDX3X isoform 11	5.69948		106	73981384	Na(+)/H(+) exchange regulatory cofactor NHE-RF3 isoform 2	6.52679
107	345807425	ephrin-B1	6.74009		107	73967439	tubulin beta-2C chain isoform 1	5.68868		107	57095034	protein FAM83B	6.16927
108	345784504	afadin	6.654		108	73945522	syntaxin-7 isoform 5	5.62603		108	73991135	leucine-rich repeat transmembrane protein FLRT3 isoform 3	6.15208
109	345793345	integrin beta-1	6.55068		109	73955372	profilin-1-like	5.59871		109	187937195	transient receptor potential cation channel subfamily V member 4	6.14806
110	147904030	carcinoembryonic antigen-related cell adhesion molecule 28 precursor	6.54857		110	359319033	protein LAP2-like isoform 2	5.55212		110	73983002	ras-related protein Rab-1B isoform 1	6.12279
111	356461044	peroxiredoxin-1	6.45351		111	73980918	macrophage-capping protein	5.54391		111	73950745	EF-hand domain-containing protein D2	6.06245
112	50979218	protein 4.1	6.40792		112	73953390	eukaryotic translation initiation factor 4E-binding protein 2	5.5329		112	345792440	PDZ and LIM domain protein 1	6.03859
113	73963313	pleckstrin-2 isoform 1	6.37544		113	345777517	charged multivesicular body protein 5 isoform 1	5.52484		113	311771751	ras-related protein Rab-10	6.03758
114	345799411	nudC domain-containing protein 2	6.34984		114	345805450	coiled-coil domain-containing protein 43	5.49136		114	73987268	AP-3 complex subunit delta-1 isoform 1	6.00622
115	73948978	vimentin isoform 12	6.32265		115	345804750	septin-9	5.47224		115	356582259	prothymosin alpha	5.98473
116	345793058	syntenin-1 isoform 1	6.27232		116	73990204	cytoplasmic protein NCK1 isoform 2	5.43219		116	73953093	voltage-dependent anion-selective channel protein 2 isoform 2	5.97255
117	73996125	coatomer subunit zeta-1 isoform 2	6.20044		117	359319518	segment polarity protein dishevelled homolog DVL-1-like	5.39031		117	345801038	TLD domain-containing protein KIAA1609	5.79335
118	73952670	ankyrin-3 isoform 1	6.17048		118	114326321	phosphatidylethanolamine-binding protein 1	5.36858		118	73965092	cdc42 effector protein 4	5.67851
119	274326247	testin	6.13989		119	345795005	myosin-Ie	5.362		119	57040322	ras suppressor protein 1	5.65848
120	345789091	sodium bicarbonate cotransporter 3	6.07017		120	73948978	vimentin isoform 12	5.28803		120	55741803	tight junction protein ZO-1	5.59263
121	307938303	actin, cytoplasmic 1	5.99204		121	73996231	poly(rC)-binding protein 2 isoform 15	5.2461		121	50979110	caveolin-1	5.58895
122	345778644	tubulin beta chain	5.95785		122	73987268	AP-3 complex subunit delta-1 isoform 1	5.18585		122	345804718	uncharacterized protein LOC608361	5.54961
123	73983142	Finkel-Biskis-Reilly murine sarcoma virus (FBR-MuSV) ubiquitously expressed isoform 2	5.92998		123	345802928	TIP41-like protein	5.18542		123	356461044	peroxiredoxin-1	5.53282
124	345799052	PDZ and LIM domain protein 7	5.88781		124	345804687	casein kinase I isoform delta	5.16058		124	345790915	serine/threonine-protein kinase TAO3 isoform 5	5.4767
125	73945522	syntaxin-7 isoform 5	5.7566		125	73945680	protein-L-isoaspartate(D-aspartate) O-methyltransferase isoform 8	5.14708		125	73998521	gamma-adducin isoform 1	5.47149
126	359319613	claudin-4-like	5.74949		126	73955537	segment polarity protein dishevelled homolog DVL-2	5.14617		126	73992442	tumor protein D54 isoform 1	5.46771
127	73963551	protein numb homolog isoform 1	5.73138		127	73985218	ADP-ribosylation factor 4 isoform 2	5.13318		127	345804278	protein FAM177A1	5.46477
128	73996231	poly(rC)-binding protein 2 isoform 15	5.58942		128	74008829	filamin-A isoform 1	5.10082		128	73962778	syntaxin-binding protein 6	5.32676
129	73983369	muscarinic acetylcholine receptor M4	5.53132		129	73989867	N-acylneuraminate-9-phosphatase	5.07868		129	359319375	tumor-associated calcium signal transducer 2	5.30989
130	73950452	MARCKS-related protein	5.49577		130	359320122	fermitin family homolog 2	5.06451		130	345784192	membrane-associated progesterone receptor component 2	5.28625
131	359318495	protein-L-isoaspartate(D-aspartate) O-methyltransferase	5.42663		131	50950177	annexin A2	5.01509		131	73950747	transmembrane protein 51	5.26401
132	73964747	rho GDP-dissociation inhibitor 1 isoform 2	5.42039		132	345796663	segment polarity protein dishevelled homolog DVL-3	4.99765		132	345795292	beta-secretase 2	5.24603
133	345802512	cysteine and glycine-rich protein 1 isoform 1	5.39394		133	73949060	ADP-sugar pyrophosphatase isoform 1	4.91133		133	345780995	oxysterol-binding protein-related protein 8 isoform 1	5.23828
134	325301273	translocon-associated protein subunit delta precursor	5.3597		134	73964747	rho GDP-dissociation inhibitor 1 isoform 2	4.86269		134	74002818	serine/threonine-protein kinase PAK 2 isoform 1	5.21299
135	345793266	peroxiredoxin-1-like	5.35268		135	345800344	lethal(2) giant larvae protein homolog 1	4.77937		135	345802858	zinc transporter 1, partial	5.1968
136	359319882	ladinin-1	5.34344		136	57104538	charged multivesicular body protein 4b	4.70014		136	345784504	afadin	5.18258
137	73961676	protein S100-A6 isoform 2	5.10881		137	345793266	peroxiredoxin-1-like	4.67717		137	73994927	AP-1 complex subunit beta-1 isoform 3	5.10859
138	345796951	tubulin beta-2B chain isoform 2	5.08383		138	359323234	ADP-ribosylation factor-like protein 3-like	4.66313		138	57085907	heat shock cognate 71 kDa protein isoform 1	5.07611
139	359320108	cysteine-rich protein 2	5.07305		139	73963551	protein numb homolog isoform 1	4.46632		139	359318809	sodium/potassium-transporting ATPase subunit alpha-3	5.05533
140	356991175	uncharacterized protein LOC100846982	5.05837		140	55741705	ras-related protein Rab-1A	4.44364		140	345781300	extended synaptotagmin-2	5.04049
141	73953390	eukaryotic translation initiation factor 4E-binding protein 2	4.95019		141	345796449	claudin-16	4.39673		141	74000462	sorting nexin-1 isoform 1	4.98988
142	359322181	membrane-associated guanylate kinase, WW and PDZ domain-containing protein 1	4.92906		142	345778074	catenin alpha-1	4.39637		142	345797675	junctional adhesion molecule A	4.93508
143	73955537	segment polarity protein dishevelled homolog DVL-2	4.92131		143	345776760	ADP-ribosylation factor GTPase-activating protein 3	4.38228		143	73983267	receptor-type tyrosine-protein phosphatase eta	4.88642
144	73945728	ezrin isoform 1	4.90474		144	73969119	casein kinase I isoform epsilon isoform 3	4.37806		144	359320658	protein kinase C and casein kinase substrate in neurons protein 2	4.87343
145	345800344	lethal(2) giant larvae protein homolog 1	4.8526		145	359320658	protein kinase C and casein kinase substrate in neurons protein 2	4.36786		145	73948496	lipolysis-stimulated lipoprotein receptor	4.87207
146	359320868	sorting nexin-3 isoform 2	4.74972		146	345797440	partitioning defective 3 homolog B isoform 2	4.34293		146	73966152	LIM and SH3 domain protein 1 isoform 2	4.86886
147	345796663	segment polarity protein dishevelled homolog DVL-3	4.70306		147	57093665	bis(5'-nucleosyl)-tetraphosphatase [asymmetrical]	4.24829		147	345780124	neurabin-1 isoform 1	4.85822
148	345792855	rab11 family-interacting protein 2	4.61316		148	73973432	ras-related protein Rab-23	4.18225		148	359322148	amyloid beta A4 precursor protein-binding family A member 3	4.79766
149	50979026	tyrosine-protein kinase Yes	4.61316		149	57088999	vesicle-associated membrane protein 4	4.11051		149	345789997	erythrocyte membrane protein band 4.1-like 1	4.78796
150	345777291	calmodulin isoform 2	4.58293		150	73950822	adaptin ear-binding coat-associated protein 2 isoform 2	4.0426		150	57098751	vesicle-trafficking protein SEC22b	4.78127
151	359320572	extended synaptotagmin-1	4.5478		151	359320572	extended synaptotagmin-1	4.03701		151	345789199	ras-related protein Rab-6B	4.74305
152	73993916	coiled-coil domain-containing protein 25	4.54342		152	73954046	serine/threonine-protein kinase 10	4.02663		152	73977652	lamina-associated polypeptide 2, isoforms beta/delta/epsilon/gamma isoform 7	4.73742
153	345787491	microtubule-associated protein 4 isoform 1	4.53392		153	345787726	coiled-coil and C2 domain-containing protein 1A isoform 1	4.02457		153	74004765	COBL-like 1	4.71135
154	356582259	prothymosin alpha	4.49488		154	345793331	partitioning defective 3 homolog isoform 1	4.00343		154	345792339	pleckstrin homology domain-containing family A member 5	4.70948
155	345804687	casein kinase I isoform delta	4.48372		155	345807932	glyceraldehyde-3-phosphate dehydrogenase-like	3.96014		155	359323129	tubulin alpha-1C chain-like	4.65861
156	57089975	tandem C2 domains nuclear protein isoform 1	4.44767		156	73969750	EH domain-binding protein 1 isoform 4	3.94904		156	345800344	lethal(2) giant larvae protein homolog 1	4.62778
157	345795005	myosin-Ie	4.44373		157	345796634	protein MB21D2	3.90445		157	345800049	ubiquitin carboxyl-terminal hydrolase 43	4.54939
158	73969119	casein kinase I isoform epsilon isoform 3	4.37689		158	345790089	D-tyrosyl-tRNA(Tyr) deacylase 1	3.88974		158	73964085	MAP/microtubule affinity-regulating kinase 3 isoform 5	4.54791
159	359318970	protocadherin-1-like isoform 2	4.36961		159	345787801	switch-associated protein 70 isoform 2	3.87285		159	114326335	palmitoyltransferase ZDHHC5	4.54305
160	114326321	phosphatidylethanolamine-binding protein 1	4.35381		160	50978772	claudin-2	3.87092		160	73988027	ragulator complex protein LAMTOR1 isoform 1	4.52426
161	74009724	peptidyl-prolyl cis-trans isomerase A	4.34475		161	345807425	ephrin-B1	3.86528		161	345781880	syndecan-1	4.50902
162	73994955	merlin isoform 7	4.33544		162	345797211	plakophilin-4 isoform 3	3.83804		162	345789806	nucleolar protein 56	4.4768
163	356582418	nascent polypeptide-associated complex subunit alpha	4.29341		163	359319430	misshapen-like kinase 1	3.82888		163	345795763	PDZ and LIM domain protein 5 isoform 11	4.47581
164	73947369	poliovirus receptor-related protein 2 isoform 2	4.2853		164	345798781	uncharacterized protein C1orf198	3.81397		164	359324247	sodium- and chloride-dependent creatine transporter 1	4.44429
165	57095034	protein FAM83B	4.27412		165	345799411	nudC domain-containing protein 2	3.74091		165	345802512	cysteine and glycine-rich protein 1 isoform 1	4.4314
166	345797440	partitioning defective 3 homolog B isoform 2	4.19974		166	74009724	peptidyl-prolyl cis-trans isomerase A	3.71341		166	50978966	tight junction protein ZO-2	4.41774
167	345776760	ADP-ribosylation factor GTPase-activating protein 3	4.18391		167	345779000	myosin-VI isoform 8	3.62112		167	73970139	epithelial cell adhesion molecule	4.38934
168	345793444	sickle tail protein homolog isoform 1	4.13096		168	359318974	FCH domain only protein 2	3.6162		168	73966805	AP-1 complex subunit beta-1 isoform 3	4.36074
169	73980918	macrophage-capping protein	4.10761		169	73994955	merlin isoform 7	3.60879		169	345791046	TBC1 domain family member 10A isoform 2	4.34054
170	359324076	coiled-coil domain-containing protein 25-like	4.10745		170	375065844	heterogeneous nuclear ribonucleoprotein K	3.58657		170	308199425	elongation factor 1-alpha 1	4.33814
171	50950177	annexin A2	4.10718		171	345800374	plasminogen activator inhibitor 1 RNA-binding protein isoform 1	3.58129		171	345793963	uncharacterized protein KIAA1522	4.32039
172	345779036	oxidation resistance protein 1 isoform 1	4.06139		172	345795347	charged multivesicular body protein 2b	3.56952		172	73967304	carboxypeptidase D isoform 2	4.28445
173	73989867	N-acylneuraminate-9-phosphatase	4.06021		173	73992599	breast carcinoma-amplified sequence 1	3.53845		173	345807408	vesicle-associated membrane protein 7 isoform 1	4.26716
174	345776969	protein FAM83F	4.0212		174	50979156	ras-related protein Rab-7a	3.53296		174	345797211	plakophilin-4 isoform 3	4.25385
175	345777399	AP-3 complex subunit sigma-1-like isoform 3	3.99055		175	73945728	ezrin isoform 1	3.5306		175	73979922	prolactin regulatory element-binding protein isoform 1	4.23109
176	57088999	vesicle-associated membrane protein 4	3.96192		176	345793135	junctophilin-1 isoform 1	3.42416		176	345805018	adapter molecule crk isoform 1	4.22013
177	73962778	syntaxin-binding protein 6	3.95318		177	73968671	fibroblast growth factor receptor substrate 2 isoform 1	3.41696		177	345807932	glyceraldehyde-3-phosphate dehydrogenase-like	4.21374
178	345800183	UPF0587 protein C1orf123 homolog	3.95278		178	345777622	SH2 domain-containing adapter protein B	3.38206		178	57044069	wiskott-Aldrich syndrome protein family member 2 isoform 2	4.20278
179	311771751	ras-related protein Rab-10	3.9457		179	57043260	stathmin isoform 1	3.34849		179	73971644	ras-related protein Rab-14 isoform 1	4.09891
180	73947690	serine/threonine-protein kinase PAK 4 isoform 1	3.91003		180	345791797	eukaryotic translation initiation factor 4B isoform 12	3.34623		180	73981482	membrane-associated guanylate kinase, WW and PDZ domain-containing protein 3 isoform 2	4.03996
181	345777622	SH2 domain-containing adapter protein B	3.84515		181	345790828	septin-2	3.302		181	73985218	ADP-ribosylation factor 4 isoform 2	4.02567
182	356460954	chloride intracellular channel protein 1	3.83558		182	50978672	serine/threonine-protein phosphatase PP1-beta catalytic subunit	3.29288		182	345799948	uncharacterized protein C11orf52	4.02451
183	345796205	immunoglobulin superfamily member 11	3.82142		183	345802250	transmembrane channel-like 5 isoform 3	3.29004		183	345784138	metalloreductase STEAP3	4.01924
184	73997796	tubby-related protein 3	3.81874		184	345800726	large neutral amino acids transporter small subunit 1 isoform 2	3.26454		184	359319430	misshapen-like kinase 1	4.01038
185	345801654	calponin-3	3.78054		185	345801304	BAI1-associated protein 2-like 1 isoform 1	3.1796		185	73951892	RELT-like 1	3.99754
186	74007500	moesin isoform 2	3.74989		186	359322074	peroxiredoxin-2-like isoform 1	3.1554		186	345792771	STE20-like kinase	3.9934
187	345807932	glyceraldehyde-3-phosphate dehydrogenase-like	3.73316		187	345789091	sodium bicarbonate cotransporter 3	3.15132		187	73987780	phosphatidylinositol-binding clathrin assembly protein isoform 4	3.98395
188	345800049	ubiquitin carboxyl-terminal hydrolase 43	3.7298		188	345804718	uncharacterized protein LOC608361	3.14601		188	57090551	ADP-ribosylation factor 6	3.98265
189	73977652	lamina-associated polypeptide 2, isoforms beta/delta/epsilon/gamma isoform 7	3.71565		189	345777399	AP-3 complex subunit sigma-1-like isoform 3	3.13825		189	356991175	uncharacterized protein LOC100846982	3.97696
190	359324247	sodium- and chloride-dependent creatine transporter 1	3.67729		190	73954811	radixin isoform 1	3.07592		190	359320108	cysteine-rich protein 2	3.93838
191	73987268	AP-3 complex subunit delta-1 isoform 1	3.66681		191	359318970	protocadherin-1-like isoform 2	3.06466		191	73989728	serine/threonine-protein kinase OSR1 isoform 2	3.92582
192	50979052	annexin A13	3.65998		192	134085902	rho GTPase-activating protein 1	3.00769		192	345784238	UBX domain-containing protein 4 isoform 1	3.8985
193	57043260	stathmin isoform 1	3.6584		193	148226605	stromal membrane-associated protein 1	2.91651		193	57101400	ras-related protein Rab-3D	3.86206
194	73955372	profilin-1-like	3.65256		194	345792771	STE20-like kinase	2.88976		194	57093423	poly(rC)-binding protein 1 isoform 1	3.8307
195	345805828	putative GTP-binding protein Parf	3.59408		195	73994175	SH3 domain-binding protein 4	2.87541		195	308081799	galectin-3	3.82899
196	50979136	sodium/potassium-transporting ATPase subunit alpha-1 precursor	3.58838		196	345799948	uncharacterized protein C11orf52	2.87417		196	359320530	RAB21, member RAS oncogene family, partial	3.82358
197	54792725	ras-related protein Rab-11A	3.58675		197	359322946	tyrosine-protein phosphatase non-receptor type 11	2.87256		197	114326321	phosphatidylethanolamine-binding protein 1	3.79881
198	73969626	spectrin beta chain, brain 1 isoform 1	3.586		198	345781474	zyxin	2.86547		198	50978862	glyceraldehyde-3-phosphate dehydrogenase	3.78337
199	359319033	protein LAP2-like isoform 2	3.54776		199	345796205	immunoglobulin superfamily member 11	2.85748		199	73959919	putative adenosylhomocysteinase 2	3.77098
200	73983267	receptor-type tyrosine-protein phosphatase eta	3.53515		200	153791666	hematological and neurological expressed 1 protein	2.85337		200	359319808	hematological and neurological expressed 1-like protein-like	3.72566
201	73999120	tyrosine-protein kinase Lyn isoform 1	3.5325		201	345793696	leucine zipper protein 1	2.84732		201	345803790	ATP-dependent RNA helicase DDX24	3.70824
202	359321995	MKI67 FHA domain-interacting nucleolar phosphoprotein-like	3.51567		202	73947369	poliovirus receptor-related protein 2 isoform 2	2.83865		202	345802250	transmembrane channel-like 5 isoform 3	3.68365
203	345787726	coiled-coil and C2 domain-containing protein 1A isoform 1	3.49742		203	345776847	cdc42 effector protein 1	2.83532		203	345804193	protein AHNAK2	3.67969
204	73959919	putative adenosylhomocysteinase 2	3.45987		204	73950452	MARCKS-related protein	2.83132		204	308153291	plasma membrane calcium-transporting ATPase 1	3.66892
205	345798663	secretory carrier-associated membrane protein 1 isoform 2	3.42383		205	345793367	rho GTPase-activating protein 12	2.82806		205	345793418	abl interactor 1 isoform 9	3.65366
206	73961491	lamin-B receptor	3.39373		206	345795711	tyrosine-protein phosphatase non-receptor type 13 isoform 2	2.82156		206	345804663	G-protein coupled receptor family C group 5 member C	3.62408
207	74010709	drebrin-like isoform 2	3.37324		207	57040322	ras suppressor protein 1	2.82059		207	55741707	ras-related protein Rab-8A	3.61349
208	345804718	uncharacterized protein LOC608361	3.36371		208	345803763	leucine-rich repeat transmembrane protein FLRT2	2.79249		208	73995905	v-crk sarcoma virus CT10 oncogene homolog (avian)-like isoform 1	3.58213
209	57104538	charged multivesicular body protein 4b	3.32858		209	73959919	putative adenosylhomocysteinase 2	2.76692		209	61316260	caveolin-2	3.53998
210	359322074	peroxiredoxin-2-like isoform 1	3.30909		210	57092489	lysozyme	2.73809		210	345790631	arf-GAP domain and FG repeats-containing protein 1 isoform 1	3.5224
211	50978672	serine/threonine-protein phosphatase PP1-beta catalytic subunit	3.30825		211	345797763	3'(2'),5'-bisphosphate nucleotidase 1	2.71204		211	73983369	muscarinic acetylcholine receptor M4	3.51751
212	345777517	charged multivesicular body protein 5 isoform 1	3.29004		212	345793058	syntenin-1 isoform 1	2.70175		212	73958967	protein C16orf88 homolog	3.44826
213	345780124	neurabin-1 isoform 1	3.28635		213	223556019	carbonic anhydrase 2	2.6941		213	345805335	2',3'-cyclic-nucleotide 3'-phosphodiesterase	3.42988
214	345797117	Golgi reassembly-stacking protein 2	3.2598		214	359320868	sorting nexin-3 isoform 2	2.68988		214	345800829	WW domain-containing oxidoreductase	3.41643
215	74010705	drebrin-like isoform 7	3.2484		215	50978670	serine/threonine-protein phosphatase PP1-gamma catalytic subunit	2.68738		215	345794843	leucine-rich repeat-containing protein 57	3.41332
216	55741707	ras-related protein Rab-8A	3.2463		216	147904030	carcinoembryonic antigen-related cell adhesion molecule 28 precursor	2.67574		216	345791835	uncharacterized protein LOC100683401 isoform 2	3.36754
217	345791799	eukaryotic translation initiation factor 4B isoform 14	3.23225		217	345780399	stromal membrane-associated protein 2	2.67046		217	73968313	ras-related protein Rab-5B isoform 1	3.36112
218	57040322	ras suppressor protein 1	3.21532		218	345786850	twinfilin-2	2.65765		218	345803222	uncharacterized protein LOC100682741	3.3482
219	359322167	paralemmin-1	3.20183		219	73953093	voltage-dependent anion-selective channel protein 2 isoform 2	2.65136		219	73963551	protein numb homolog isoform 1	3.31888
220	73950747	transmembrane protein 51	3.18728		220	345780995	oxysterol-binding protein-related protein 8 isoform 1	2.64492		220	356460954	chloride intracellular channel protein 1	3.29564
221	375065844	heterogeneous nuclear ribonucleoprotein K	3.18202		221	345790868	BRCA1-associated protein	2.62553		221	345799052	PDZ and LIM domain protein 7	3.26189
222	73967304	carboxypeptidase D isoform 2	3.14147		222	354459407	voltage-dependent anion-selective channel protein 3 isoform 2	2.59077		222	359322074	peroxiredoxin-2-like isoform 1	3.26103
223	345802250	transmembrane channel-like 5 isoform 3	3.13048		223	50979317	protein transport protein Sec61 subunit beta	2.59051		223	345796205	immunoglobulin superfamily member 11	3.25796
224	345806042	arrestin domain-containing protein 1	3.10808		224	57099669	cofilin-1 isoform 1	2.5515		224	73992635	vesicle-associated membrane protein-associated protein B	3.23722
225	345780995	oxysterol-binding protein-related protein 8 isoform 1	3.09409		225	359318694	tubulin-folding cofactor B	2.54305		225	73987574	serine/threonine-protein kinase STK11	3.18198
226	345787803	switch-associated protein 70 isoform 1	3.09322		226	345779559	protein scribble homolog, partial	2.53528		226	422010972	55 kDa erythrocyte membrane protein	3.17706
227	73954811	radixin isoform 1	3.07538		227	359320319	tax1-binding protein 3-like isoform 1	2.5276		227	73969949	UPF0444 transmembrane protein C12orf23 homolog	3.17542
228	73960795	serine/threonine-protein kinase MRCK alpha isoform 5	3.07407		228	74007500	moesin isoform 2	2.52445		228	345803473	ubiquitin carboxyl-terminal hydrolase 14	3.15947
229	50978670	serine/threonine-protein phosphatase PP1-gamma catalytic subunit	3.06277		229	74005825	plasma membrane calcium-transporting ATPase 4 isoform 3	2.50804		229	73952189	secretory carrier-associated membrane protein 1 isoform 3	3.15846
230	57092489	lysozyme	3.02911		230	73996125	coatomer subunit zeta-1 isoform 2	2.50104		230	359322003	ATP-dependent RNA helicase DDX18	3.15736
231	73968671	fibroblast growth factor receptor substrate 2 isoform 1	3.02791		231	73957738	eukaryotic translation initiation factor 4H	2.49713		231	345804750	septin-9	3.15071
232	74000478	peptidyl-prolyl cis-trans isomerase B isoform 1	3.00839		232	359322167	paralemmin-1	2.49209		232	359322066	ras-related protein Rab-43-like	3.11461
233	345795711	tyrosine-protein phosphatase non-receptor type 13 isoform 2	3.00788		233	74004765	COBL-like 1	2.47477		233	73945522	syntaxin-7 isoform 5	3.11362
234	50978964	tight junction protein ZO-3	3.00711		234	73965092	cdc42 effector protein 4	2.45953		234	359322946	tyrosine-protein phosphatase non-receptor type 11	3.10004
235	308153291	plasma membrane calcium-transporting ATPase 1	2.99103		235	345783231	syntaxin-5	2.45636		235	354459407	voltage-dependent anion-selective channel protein 3 isoform 2	3.0891
236	345804148	WD repeat-containing protein 20 isoform 6	2.9766		236	345796154	disks large homolog 1 isoform 4	2.45574		236	345793056	syntenin-1 isoform 2	3.08867
237	74004765	COBL-like 1	2.97428		237	73948986	signal transducing adapter molecule 1	2.453		237	359324088	emerin-like	3.07203
238	345803473	ubiquitin carboxyl-terminal hydrolase 14	2.96732		238	356991173	AP-3 complex subunit sigma-2	2.45208		238	345796634	protein MB21D2	3.06308
239	359319326	redox-regulatory protein PAMM	2.9254		239	74002818	serine/threonine-protein kinase PAK 2 isoform 1	2.41714		239	73950682	F-actin-capping protein subunit beta	3.05434
240	73965092	cdc42 effector protein 4	2.90994		240	74003058	exocyst complex component 3 isoform 3	2.40731		240	345777517	charged multivesicular body protein 5 isoform 1	3.0497
241	345802882	syntaxin-6	2.90556		241	345787491	microtubule-associated protein 4 isoform 1	2.40318		241	17737325	cytochrome c oxidase subunit II	3.04283
242	359319808	hematological and neurological expressed 1-like protein-like	2.90437		242	74000478	peptidyl-prolyl cis-trans isomerase B isoform 1	2.3609		242	359321995	MKI67 FHA domain-interacting nucleolar phosphoprotein-like	3.01429
243	73954685	coatomer subunit delta isoform 1	2.89752		243	345793418	abl interactor 1 isoform 9	2.31238		243	345781540	rab11 family-interacting protein 1	3.00575
244	74003615	eukaryotic translation initiation factor 5A-2 isoform 2	2.88956		244	308082020	triosephosphate isomerase	2.3092		244	345802882	syntaxin-6	2.96836
245	50950141	presenilin-1	2.87843		245	73998521	gamma-adducin isoform 1	2.30463		245	74010709	drebrin-like isoform 2	2.96305
246	57099669	cofilin-1 isoform 1	2.8681		246	74002483	PEST proteolytic signal-containing nuclear protein isoform 3	2.29221		246	73953687	casein kinase I isoform alpha isoform 1	2.96001
247	73968313	ras-related protein Rab-5B isoform 1	2.83352		247	345803603	enhancer of rudimentary homolog	2.28253		247	54792725	ras-related protein Rab-11A	2.95809
248	345779124	protein FAM91A1	2.80309		248	345782271	kinase D-interacting substrate of 220 kDa isoform 1	2.26526		248	345804554	soluble calcium-activated nucleotidase 1 isoform 4	2.95437
249	345795347	charged multivesicular body protein 2b	2.77666		249	345795838	protein transport protein Sec24B isoform 1	2.25706		249	345796154	disks large homolog 1 isoform 4	2.94001
250	73991940	proto-oncogene tyrosine-protein kinase Src isoform 5	2.75819		250	54792725	ras-related protein Rab-11A	2.23931		250	73969626	spectrin beta chain, brain 1 isoform 1	2.92123
251	73998521	gamma-adducin isoform 1	2.73855		251	311771751	ras-related protein Rab-10	2.20744		251	57101288	palmitoyltransferase ZDHHC3 isoform 1	2.91013
252	73951892	RELT-like 1	2.6979		252	345779909	coatomer subunit gamma-2	2.20436		252	345805483	proline rich 15-like	2.90376
253	73950822	adaptin ear-binding coat-associated protein 2 isoform 2	2.69697		253	308153291	plasma membrane calcium-transporting ATPase 1	2.20312		253	359319518	segment polarity protein dishevelled homolog DVL-1-like	2.89128
254	359320000	feline leukemia virus subgroup C receptor-related protein 1-like	2.69693		254	345779148	protein EFR3 homolog A	2.18792		254	74010705	drebrin-like isoform 7	2.88068
255	73979956	sorting nexin-17 isoform 2	2.68554		255	74007756	UPF0368 protein Cxorf26-like isoform 1	2.18435		255	345807971	septin-6 isoform 5	2.86585
256	345793135	junctophilin-1 isoform 1	2.68154		256	345804193	protein AHNAK2	2.16619		256	359321796	EH domain-containing protein 1	2.84651
257	345779000	myosin-VI isoform 8	2.66594		257	303228324	GTP-binding nuclear protein Ran	2.16256		257	359323234	ADP-ribosylation factor-like protein 3-like	2.84281
258	50979110	caveolin-1	2.6616		258	73950747	transmembrane protein 51	2.1588		258	73950129	MARVEL domain-containing protein 2	2.83599
259	74006851	3-beta-hydroxysteroid-Delta(8),Delta(7)-isomerase isoform 1	2.65606		259	345793345	integrin beta-1	2.12848		259	74000847	ras-related protein Rab-8B	2.81642
260	73987813	synaptotagmin-like 2 isoform 3	2.65307		260	345796185	pleckstrin homology-like domain, family B, member 2 isoform 1	2.12517		260	306482574	disintegrin and metalloproteinase domain-containing protein 9 precursor	2.80422
261	359322946	tyrosine-protein phosphatase non-receptor type 11	2.62663		261	57092849	phosducin-like 3 isoform 1	2.11357		261	57088999	vesicle-associated membrane protein 4	2.79465
262	345799149	integrin alpha-2	2.62619		262	167860154	ketosamine-3-kinase	2.0872		262	359323991	kin of IRRE-like protein 1	2.7612
263	73987612	basigin	2.59095		263	345800049	ubiquitin carboxyl-terminal hydrolase 43	2.06985		263	345776663	neutral amino acid transporter A isoform 1	2.73944
264	359323682	ADP-ribosylation factor-like 13B	2.59064		264	73968197	family with sequence similarity 129, member B	2.04758		264	73955372	profilin-1-like	2.72467
265	345781300	extended synaptotagmin-2	2.58068		265	345776566	phosphatidylinositol-5-phosphate 4-kinase type-2 gamma	2.03585		265	73975746	cyclin-dependent kinase 14 isoform 3	2.72229
266	345784238	UBX domain-containing protein 4 isoform 1	2.56218		266	73968313	ras-related protein Rab-5B isoform 1	2.01458		266	305410870	membrane-associated progesterone receptor component 1	2.71301
267	345804663	G-protein coupled receptor family C group 5 member C	2.55292		267	345801663	formin binding protein 1-like isoform 1	2.01313		267	73981685	ras-related protein Ral-A isoform 1	2.7077
268	359322436	ras-related protein Rab-6A	2.55127		268	345788952	protein CDV3 homolog	2.01293		268	116829774	inactive rhomboid protein 2	2.68168
269	345800177	gamma-glutamyltransferase 6 isoform 1	2.54058		269	160425231	myosin-9	2.00179		269	345795915	septin-11	2.64117
270	345793161	fatty acid-binding protein, epidermal	2.53994		270	73987813	synaptotagmin-like 2 isoform 3	1.96764		270	223556019	carbonic anhydrase 2	2.62415
271	345797874	sodium/potassium-transporting ATPase subunit alpha-2 isoform 1	2.53913		271	345802882	syntaxin-6	1.94639		271	73963313	pleckstrin-2 isoform 1	2.62105
272	345793331	partitioning defective 3 homolog isoform 1	2.53543		272	345800183	UPF0587 protein C1orf123 homolog	1.93377		272	359320368	polymerase I and transcript release factor-like	2.60603
273	73994175	SH3 domain-binding protein 4	2.48854		273	345804359	thioredoxin-related transmembrane protein 1	1.93251		273	359320638	mitogen-activated protein kinase kinase kinase kinase 4 isoform 2	2.59299
274	345789997	erythrocyte membrane protein band 4.1-like 1	2.48558		274	345787655	epidermal growth factor receptor pathway substrate 15-like 1 isoform 2	1.929		274	73961473	Golgi resident protein GCP60	2.56664
275	345796154	disks large homolog 1 isoform 4	2.47899		275	345789341	eukaryotic translation initiation factor 2A	1.92246		275	356582418	nascent polypeptide-associated complex subunit alpha	2.56615
276	74003058	exocyst complex component 3 isoform 3	2.46039		276	73969626	spectrin beta chain, brain 1 isoform 1	1.91222		276	359319326	redox-regulatory protein PAMM	2.55061
277	345796634	protein MB21D2	2.4367		277	73962778	syntaxin-binding protein 6	1.91161		277	73968197	family with sequence similarity 129, member B	2.53981
278	345802930	myelin protein zero-like 1	2.4284		278	345797117	Golgi reassembly-stacking protein 2	1.90959		278	345799717	myelin protein zero-like 2	2.52414
279	74005894	ras-related protein Rab-7L1 isoform 1	2.41793		279	73974180	14-3-3 protein zeta/delta isoform 2	1.89664		279	148231530	carcinoembryonic antigen-related cell adhesion molecule 30 precursor	2.5149
280	345797971	ras-related protein Rab-7L1	2.41391		280	345796461	coiled-coil domain-containing protein 50	1.8808		280	345778074	catenin alpha-1	2.50922
281	73988219	rho-related GTP-binding protein RhoG	2.41322		281	73992732	ADP-ribosylation factor GTPase-activating protein 1	1.86777		281	73953390	eukaryotic translation initiation factor 4E-binding protein 2	2.50536
282	73946134	A-kinase anchor protein 12	2.39742		282	50978638	thiopurine S-methyltransferase	1.8572		282	345793181	copine-3	2.50498
283	73948496	lipolysis-stimulated lipoprotein receptor	2.38534		283	74006567	SH3 domain-containing kinase-binding protein 1 isoform 2	1.85713		283	359318968	protocadherin-1-like isoform 1	2.50385
284	73999690	solute carrier family 12 member 6 isoform 9	2.34293		284	73987150	endophilin-A2 isoform 2	1.84285		284	359322167	paralemmin-1	2.48215
285	345790915	serine/threonine-protein kinase TAO3 isoform 5	2.31696		285	73995354	coronin-1C isoform 2	1.83631		285	345777622	SH2 domain-containing adapter protein B	2.47072
286	345791797	eukaryotic translation initiation factor 4B isoform 12	2.31038		286	73996139	heterogeneous nuclear ribonucleoprotein A1-like isoform 2	1.79602		286	345777291	calmodulin isoform 2	2.45904
287	345807971	septin-6 isoform 5	2.29522		287	57085045	phytanoyl-CoA 2-hydroxylase interacting protein-like	1.78978		287	345804995	Golgi SNAP receptor complex member 1	2.44692
288	356991173	AP-3 complex subunit sigma-2	2.29473		288	345796436	lipoma-preferred partner isoform 1	1.78225		288	345777401	guanine nucleotide binding protein (G protein), beta polypeptide 2-like 1 isoform 1	2.44665
289	74005825	plasma membrane calcium-transporting ATPase 4 isoform 3	2.28794		289	345793963	uncharacterized protein KIAA1522	1.77979		289	345799464	cytoplasmic FMR1-interacting protein 2	2.44435
290	73981528	ras-related protein Rap-1A isoform 2	2.28652		290	74002664	glycogen synthase kinase-3 beta isoform 2	1.73529		290	359320000	feline leukemia virus subgroup C receptor-related protein 1-like	2.43564
291	50978728	serine/threonine-protein phosphatase PP1-alpha catalytic subunit	2.27367		291	345794001	phosphatase and actin regulator 4	1.7323		291	74003324	AP-2 complex subunit mu isoform 21	2.43538
292	345784138	metalloreductase STEAP3	2.26681		292	50978964	tight junction protein ZO-3	1.71812		292	50979138	sodium- and chloride-dependent taurine transporter	2.42044
293	73961165	uncharacterized protein C1orf21	2.25345		293	73989728	serine/threonine-protein kinase OSR1 isoform 2	1.70231		293	345802930	myelin protein zero-like 1	2.4184
294	359320658	protein kinase C and casein kinase substrate in neurons protein 2	2.2494		294	57098115	14-3-3 protein theta isoform 1	1.6795		294	359323950	carboxy-terminal domain RNA polymerase II polypeptide A small phosphatase 1-like	2.41056
295	50979317	protein transport protein Sec61 subunit beta	2.22784		295	73950682	F-actin-capping protein subunit beta	1.66352		295	73984484	dolichyl-diphosphooligosaccharide--protein glycosyltransferase subunit 1 isoform 3	2.40787
296	359320768	erythrocyte membrane protein band 4.1 like 4B	2.22102		296	345790319	probable palmitoyltransferase ZDHHC20 isoform 1	1.6599		296	217416483	erythrocyte band 7 integral membrane protein	2.40209
297	345793963	uncharacterized protein KIAA1522	2.21801		297	73960795	serine/threonine-protein kinase MRCK alpha isoform 5	1.64689		297	73951083	insulin-like growth factor 1 receptor isoform 1	2.40156
298	345805996	spectrin alpha chain, brain	2.20967		298	73976815	microtubule-actin cross-linking factor 1 isoform 2	1.64424		298	74000478	peptidyl-prolyl cis-trans isomerase B isoform 1	2.39315
299	345781474	zyxin	2.20921		299	359322436	ras-related protein Rab-6A	1.62558		299	73955990	epsin-2 isoform 1	2.38768
300	345796185	pleckstrin homology-like domain, family B, member 2 isoform 1	2.20077		300	73948496	lipolysis-stimulated lipoprotein receptor	1.62306		300	345784300	protein disulfide-isomerase TMX3	2.37952
301	345800183	UPF0587 protein C1orf123 homolog	2.19125		301	212549677	catenin beta-1	1.61685		301	74000468	sorting nexin-1 isoform 4	2.36286
302	114326371	2'-5'-oligoadenylate synthase 2	2.15421		302	345804554	soluble calcium-activated nucleotidase 1 isoform 4	1.61438		302	73946098	syntaxin-11	2.35097
303	345778074	catenin alpha-1	2.13781		303	345792855	rab11 family-interacting protein 2	1.61256		303	73962894	mitogen-activated protein kinase kinase kinase kinase 5 isoform 2	2.34822
304	61316260	caveolin-2	2.13781		304	345803473	ubiquitin carboxyl-terminal hydrolase 14	1.61107		304	57088635	inactive rhomboid protein 1 isoform 1	2.32961
305	134085902	rho GTPase-activating protein 1	2.12514		305	345800417	inaD-like protein isoform 3	1.59782		305	359323682	ADP-ribosylation factor-like 13B	2.31943
306	148226605	stromal membrane-associated protein 1	2.12151		306	345783819	182 kDa tankyrase-1-binding protein	1.59754		306	50979062	ras-related protein Rab-5C	2.31093
307	359320460	allograft inflammatory factor 1-like	2.11661		307	345787872	L-lactate dehydrogenase A chain isoform 1	1.59735		307	345805828	putative GTP-binding protein Parf	2.30287
308	73990204	cytoplasmic protein NCK1 isoform 2	2.11272		308	345790306	myotubularin-related protein 6	1.58964		308	345801014	cadherin-16	2.29149
309	345793418	abl interactor 1 isoform 9	2.09809		309	345780950	purine nucleoside phosphorylase	1.58827		309	345796147	disks large homolog 1 isoform 1	2.2698
310	345807224	ras-related protein Rap-2c	2.09631		310	73948884	phosphatidylinositol-5-phosphate 4-kinase type-2 alpha	1.58315		310	73959409	syntaxin-binding protein 3 isoform 1	2.26722
311	345804554	soluble calcium-activated nucleotidase 1 isoform 4	2.09408		311	345781890	HCLS1-binding protein 3	1.57539		311	73964691	monocarboxylate transporter 4	2.25827
312	359320564	ras-related protein Rap-1b	2.07589		312	73993641	kinesin family member 13B isoform 1	1.5739		312	345781936	sodium-dependent multivitamin transporter	2.2522
313	74002483	PEST proteolytic signal-containing nuclear protein isoform 3	2.07024		313	345794456	SH3 domain binding glutamic acid-rich protein like 3	1.57204		313	345780126	neurabin-1 isoform 4	2.24389
314	50979062	ras-related protein Rab-5C	2.0543		314	50950141	presenilin-1	1.57177		314	359319512	ubiquitin-like protein ISG15-like	2.23472
315	306482574	disintegrin and metalloproteinase domain-containing protein 9 precursor	2.05248		315	73963313	pleckstrin-2 isoform 1	1.54913		315	308082020	triosephosphate isomerase	2.22999
316	345780228	metastasis-associated in colon cancer protein 1	2.04489		316	73970013	cytoplasmic protein NCK2	1.54823		316	359322717	NSFL1 cofactor p47 isoform 2	2.22635
317	73989728	serine/threonine-protein kinase OSR1 isoform 2	2.03837		317	73964567	cysteine-rich protein 1	1.54745		317	345799184	oncostatin-M-specific receptor subunit beta	2.21251
318	73964067	eukaryotic translation initiation factor 5 isoform 4	2.03244		318	345778195	casein kinase II subunit beta isoform 2	1.52271		318	57099669	cofilin-1 isoform 1	2.20819
319	57101400	ras-related protein Rab-3D	2.02269		319	359320831	talin-1-like	1.52076		319	73965183	coiled-coil domain-containing protein 47 isoform 1	2.20704
320	345795838	protein transport protein Sec24B isoform 1	2.01889		320	345789997	erythrocyte membrane protein band 4.1-like 1	1.51998		320	73945728	ezrin isoform 1	2.20659
321	73975746	cyclin-dependent kinase 14 isoform 3	2.00422		321	59958375	utrophin	1.51762		321	73954685	coatomer subunit delta isoform 1	2.20561
322	345787801	switch-associated protein 70 isoform 2	1.99205		322	356991189	diphosphoinositol polyphosphate phosphohydrolase 1	1.51718		322	73968432	ATP synthase subunit beta, mitochondrial isoform 1	2.19117
323	345794456	SH3 domain binding glutamic acid-rich protein like 3	1.98882		323	359319613	claudin-4-like	1.51488		323	57090119	peptidyl-prolyl cis-trans isomerase FKBP3 isoform 1	2.18329
324	345791226	uncharacterized protein C5orf52-like	1.98347		324	345791226	uncharacterized protein C5orf52-like	1.50897		324	359320768	erythrocyte membrane protein band 4.1 like 4B	2.17326
325	345801663	formin binding protein 1-like isoform 1	1.97834		325	57043233	syntaxin-12	1.49849		325	73994957	merlin isoform 8	2.16986
326	345801304	BAI1-associated protein 2-like 1 isoform 1	1.96842		326	359319531	protein LZIC-like	1.48379		326	345785187	uncharacterized protein LOC100686852	2.14891
327	345803013	ras-related protein Rab-13	1.96444		327	345785876	NEDD8-conjugating enzyme Ubc12	1.48227		327	345782539	Na(+)/H(+) exchange regulatory cofactor NHE-RF3 isoform 1	2.14323
328	73987574	serine/threonine-protein kinase STK11	1.9533		328	345777401	guanine nucleotide binding protein (G protein), beta polypeptide 2-like 1 isoform 1	1.47808		328	73947692	serine/threonine-protein kinase PAK 4 isoform 2	2.12907
329	359319531	protein LZIC-like	1.95075		329	359323640	osteopontin	1.47723		329	57104538	charged multivesicular body protein 4b	2.12782
330	345804193	protein AHNAK2	1.93102		330	73953207	annexin A8 isoform 1	1.46648		330	73967208	transmembrane protein 199	2.12516
331	73949060	ADP-sugar pyrophosphatase isoform 1	1.92909		331	359319326	redox-regulatory protein PAMM	1.4656		331	345795347	charged multivesicular body protein 2b	2.11399
332	345800374	plasminogen activator inhibitor 1 RNA-binding protein isoform 1	1.92381		332	345780013	staphylococcal nuclease domain-containing protein 1	1.45681		332	345796663	segment polarity protein dishevelled homolog DVL-3	2.10496
333	345789293	5'-3' exoribonuclease 1 isoform 2	1.91712		333	73996743	twinfilin-1 isoform 1	1.45391		333	73959175	H(+)/Cl(-) exchange transporter 7 isoform 1	2.094
334	345781678	small ubiquitin-related modifier 2-like	1.9165		334	73961165	uncharacterized protein C1orf21	1.44427		334	73980918	macrophage-capping protein	2.08867
335	73972761	TBC1 domain family member 22B	1.90544		335	50979062	ras-related protein Rab-5C	1.4359		335	74003615	eukaryotic translation initiation factor 5A-2 isoform 2	2.08828
336	345783231	syntaxin-5	1.90517		336	73961899	myosin regulatory light polypeptide 9-like isoform 3	1.43425		336	73981528	ras-related protein Rap-1A isoform 2	2.0532
337	345794843	leucine-rich repeat-containing protein 57	1.90161		337	345781806	sorbin and SH3 domain-containing protein 2 isoform 4	1.41581		337	345784346	ubiquitin-40S ribosomal protein S27a-like	2.05184
338	345785876	NEDD8-conjugating enzyme Ubc12	1.9003		338	345780228	metastasis-associated in colon cancer protein 1	1.40979		338	73948705	abl interactor 1 isoform 14	2.0446
339	50978814	uveal autoantigen with coiled-coil domains and ankyrin repeats	1.89305		339	73981496	F-actin-capping protein subunit alpha-1 isoform 2	1.40245		339	345804359	thioredoxin-related transmembrane protein 1	2.04428
340	73979149	pleckstrin homology domain-containing family A member 2 isoform 1	1.88227		340	345802842	specifically androgen-regulated gene protein	1.39868		340	73962054	vesicle-associated membrane protein-associated protein A isoform 2	2.0383
341	74012289	heat shock cognate 71 kDa protein-like isoform 2	1.86893		341	345787801	switch-associated protein 70 isoform 2	1.39491		341	73969959	cytoskeleton-associated protein 4	2.02362
342	73980876	eukaryotic translation initiation factor 2-alpha kinase 3	1.86731		342	345781300	extended synaptotagmin-2	1.38954		342	73971168	uncharacterized protein C9orf25 isoform 4	2.01673
343	153791666	hematological and neurological expressed 1 protein	1.86541		343	359321995	MKI67 FHA domain-interacting nucleolar phosphoprotein-like	1.38627		343	345804463	rho-related GTP-binding protein RhoJ	2.00183
344	345797763	3'(2'),5'-bisphosphate nucleotidase 1	1.86269		344	73947690	serine/threonine-protein kinase PAK 4 isoform 1	1.38371		344	57048026	cell growth-regulating nucleolar protein isoform 1	1.99553
345	345780399	stromal membrane-associated protein 2	1.85632		345	345778505	uncharacterized protein LOC100688057	1.38348		345	57108121	calcium-binding protein p22 isoform 1	1.98964
346	57085907	heat shock cognate 71 kDa protein isoform 1	1.85612		346	73968285	partner of Y14 and mago	1.37458		346	345803013	ras-related protein Rab-13	1.9748
347	73965373	LIM domain-containing protein 2	1.84925		347	50978770	claudin-3	1.36912		347	73980876	eukaryotic translation initiation factor 2-alpha kinase 3	1.96136
348	73969959	cytoskeleton-associated protein 4	1.83058		348	345792713	nucleoplasmin-3	1.34182		348	73983142	Finkel-Biskis-Reilly murine sarcoma virus (FBR-MuSV) ubiquitously expressed isoform 2	1.96134
349	345786850	twinfilin-2	1.82082		349	345786437	KN motif and ankyrin repeat domain-containing protein 2 isoform 1	1.33952		349	73990204	cytoplasmic protein NCK1 isoform 2	1.9592
350	57100869	mitochondrial intermembrane space import and assembly protein 40	1.81737		350	345785027	numb homolog (Drosophila)-like	1.33688		350	74000257	transmembrane protein 87A	1.95767
351	359318974	FCH domain only protein 2	1.80543		351	345780126	neurabin-1 isoform 4	1.33632		351	73996231	poly(rC)-binding protein 2 isoform 15	1.93351
352	345793696	leucine zipper protein 1	1.79918		352	73983267	receptor-type tyrosine-protein phosphatase eta	1.33617		352	134085902	rho GTPase-activating protein 1	1.9241
353	73950682	F-actin-capping protein subunit beta	1.79636		353	73967136	glyoxalase domain-containing protein 4 isoform 1	1.33082		353	303228324	GTP-binding nuclear protein Ran	1.92157
354	345797869	astrocytic phosphoprotein PEA-15	1.77155		354	57089603	SHC-transforming protein 1 isoform 1	1.31808		354	57098115	14-3-3 protein theta isoform 1	1.91849
355	74002818	serine/threonine-protein kinase PAK 2 isoform 1	1.77087		355	57090119	peptidyl-prolyl cis-trans isomerase FKBP3 isoform 1	1.30755		355	73952670	ankyrin-3 isoform 1	1.91758
356	66472883	podocalyxin precursor	1.76279		356	57097443	GTP-binding protein Rheb	1.30468		356	57043233	syntaxin-12	1.90295
357	73986278	dnaJ homolog subfamily B member 1 isoform 2	1.75579		357	335334928	liprin-beta-1	1.30087		357	71043798	cathepsin D precursor	1.88146
358	345785221	transmembrane protein 2 isoform 1	1.75223		358	73988219	rho-related GTP-binding protein RhoG	1.29889		358	153791666	hematological and neurological expressed 1 protein	1.87743
359	345796436	lipoma-preferred partner isoform 1	1.74772		359	50978814	uveal autoantigen with coiled-coil domains and ankyrin repeats	1.29428		359	345783819	182 kDa tankyrase-1-binding protein	1.86942
360	345800171	non-receptor tyrosine-protein kinase TNK1	1.7468		360	73976082	heterogeneous nuclear ribonucleoproteins A2/B1 isoform 3	1.2904		360	345798746	cytoplasmic FMR1-interacting protein 1	1.85845
361	187937195	transient receptor potential cation channel subfamily V member 4	1.73661		361	345778212	ubiquitin-conjugating enzyme E2 J1 isoform 1	1.28827		361	359323938	nucleolar protein 58-like	1.85843
362	73951060	lysM and putative peptidoglycan-binding domain-containing protein 4 isoform 1	1.73071		362	57095034	protein FAM83B	1.28632		362	74005825	plasma membrane calcium-transporting ATPase 4 isoform 3	1.84108
363	308081799	galectin-3	1.72373		363	359319553	kelch domain-containing protein 4	1.26969		363	73962685	rho GTPase-activating protein 5 isoform 1	1.82609
364	73951013	myotubularin-related protein 10 isoform 1	1.71512		364	359324311	uridine phosphorylase 1-like	1.26786		364	57091463	synaptic vesicle membrane protein VAT-1 homolog	1.82003
365	345802928	TIP41-like protein	1.70551		365	345782628	protein prune homolog	1.26502		365	345788882	CTD (carboxy-terminal domain, RNA polymerase II, polypeptide A) small phosphatase-like	1.81629
366	345803603	enhancer of rudimentary homolog	1.70012		366	359320768	erythrocyte membrane protein band 4.1 like 4B	1.26285		366	359320564	ras-related protein Rap-1b	1.80913
367	73993338	spartin	1.67717		367	73979149	pleckstrin homology domain-containing family A member 2 isoform 1	1.24127		367	73951013	myotubularin-related protein 10 isoform 1	1.80028
368	73982861	beta-adrenergic receptor kinase 1 isoform 2	1.65345		368	74012289	heat shock cognate 71 kDa protein-like isoform 2	1.23247		368	73958451	serine/threonine-protein kinase TAO2 isoform 2	1.7935
369	73996826	plakophilin-2 isoform 1	1.6381		369	50979054	vasodilator-stimulated phosphoprotein	1.21157		369	212276025	phosphatidylinositol-4-phosphate 5-kinase type-1 alpha	1.79013
370	73976815	microtubule-actin cross-linking factor 1 isoform 2	1.62052		370	345790915	serine/threonine-protein kinase TAO3 isoform 5	1.2115		370	73981496	F-actin-capping protein subunit alpha-1 isoform 2	1.78891
371	345789806	nucleolar protein 56	1.61874		371	359323735	N-alpha-acetyltransferase 50-like	1.20751		371	345804903	uncharacterized protein LOC490901	1.77628
372	345798379	SH3 domain-binding protein 2 isoform 1	1.61657		372	345803013	ras-related protein Rab-13	1.20163		372	73982992	protein YIF1A isoform 2	1.77375
373	114326365	2'-5'-oligoadenylate synthase 1	1.58213		373	345776969	protein FAM83F	1.19519		373	345778505	uncharacterized protein LOC100688057	1.77288
374	73946549	AN1-type zinc finger protein 5 isoform 2	1.57324		374	345804052	stonin-2	1.19359		374	209180440	solute carrier family 2 (facilitated glucose transporter), member 9	1.77258
375	73958967	protein C16orf88 homolog	1.56918		375	73981333	alpha-endosulfine isoform 3	1.19123		375	345776661	neutral amino acid transporter A isoform 2	1.76199
376	73950854	ephrin type-A receptor 2 isoform 1	1.53748		376	73961491	lamin-B receptor	1.19054		376	73986416	syntaxin-10 isoform 1	1.75657
377	356460939	transcription factor BTF3	1.52278		377	359320884	ATP-binding cassette sub-family F member 1	1.17974		377	345791129	scavenger receptor class B member 1	1.74576
378	345804359	thioredoxin-related transmembrane protein 1	1.52014		378	73951060	lysM and putative peptidoglycan-binding domain-containing protein 4 isoform 1	1.1735		378	73975490	coiled-coil-helix-coiled-coil-helix domain-containing protein 3, mitochondrial isoform 2	1.74475
379	359320726	solute carrier family 12 member 2, partial	1.50544		379	73977882	LPS-responsive vesicle trafficking, beach and anchor containing isoform 1	1.16571		379	73979203	rab11 family-interacting protein 1 isoform 1	1.73544
380	304376299	sodium/myo-inositol cotransporter	1.5041		380	345784451	protein phosphatase 1 regulatory subunit 14C	1.16398		380	73976579	late secretory pathway protein AVL9 homolog	1.70853
381	359320831	talin-1-like	1.49789		381	345797869	astrocytic phosphoprotein PEA-15	1.16036		381	73997733	cell division cycle-associated protein 3	1.70699
382	74002664	glycogen synthase kinase-3 beta isoform 2	1.4903		382	74007162	nance-Horan syndrome protein isoform 2	1.15769		382	73982080	estradiol 17-beta-dehydrogenase 12 isoform 2	1.70335
383	73970429	H/ACA ribonucleoprotein complex subunit 2 isoform 2	1.48559		383	73999690	solute carrier family 12 member 6 isoform 9	1.1342		383	73958326	syntaxin-4 isoform 2	1.69548
384	73979922	prolactin regulatory element-binding protein isoform 1	1.4849		384	359323766	alpha-2-HS-glycoprotein isoform 1	1.13155		384	356461051	glutathione S-transferase pi 1	1.69427
385	73975490	coiled-coil-helix-coiled-coil-helix domain-containing protein 3, mitochondrial isoform 2	1.48172		385	73950139	nuclear migration protein nudC isoform 1	1.12187		385	359319882	ladinin-1	1.68531
386	73955238	yorkie homolog	1.47725		386	73950600	chloride intracellular channel protein 4	1.12178		386	345806081	78 kDa glucose-regulated protein isoform 5	1.67609
387	359320098	serine/threonine-protein kinase MRCK beta isoform 2	1.46913		387	345796392	vacuolar protein sorting-associated protein 8 homolog isoform 3	1.11947		387	345779124	protein FAM91A1	1.67575
388	73992442	tumor protein D54 isoform 1	1.46156		388	359321496	zinc finger CCCH-type antiviral protein 1-like	1.11287		388	73961491	lamin-B receptor	1.66666
389	359318793	MAP/microtubule affinity-regulating kinase 4	1.45598		389	73969383	eukaryotic translation initiation factor 5B isoform 2	1.10768		389	74002483	PEST proteolytic signal-containing nuclear protein isoform 3	1.65454
390	345806239	endothelial differentiation-related factor 1	1.45508		390	73980876	eukaryotic translation initiation factor 2-alpha kinase 3	1.10237		390	74006742	ATP-dependent RNA helicase DDX3X isoform 11	1.64282
391	345801526	TBC1 domain family member 10B-like	1.44394		391	345795898	inactive ubiquitin carboxyl-terminal hydrolase 53	1.10177		391	50978672	serine/threonine-protein phosphatase PP1-beta catalytic subunit	1.64166
392	345793367	rho GTPase-activating protein 12	1.42478		392	73967304	carboxypeptidase D isoform 2	1.09648		392	359321653	rab11 family-interacting protein 5-like	1.63975
393	345778212	ubiquitin-conjugating enzyme E2 J1 isoform 1	1.42442		393	73965766	signal transducer and activator of transcription 3 isoform 1	1.09253		393	50950253	rhophilin-2	1.63717
394	345790306	myotubularin-related protein 6	1.42409		394	345785187	uncharacterized protein LOC100686852	1.09123		394	73981228	thioredoxin-interacting protein isoform 2	1.62321
395	74008829	filamin-A isoform 1	1.41134		395	73992442	tumor protein D54 isoform 1	1.07518		395	345793367	rho GTPase-activating protein 12	1.6042
396	50978988	receptor tyrosine-protein kinase erbB-2 precursor	1.40521		396	345807971	septin-6 isoform 5	1.06924		396	50950141	presenilin-1	1.60179
397	50950253	rhophilin-2	1.40004		397	57089975	tandem C2 domains nuclear protein isoform 1	1.06548		397	73959528	synaptogyrin-3	1.58815
398	73969750	EH domain-binding protein 1 isoform 4	1.39384		398	345792633	phosphoglycerate mutase 1 isoform 4	1.05942		398	73974180	14-3-3 protein zeta/delta isoform 2	1.58071
399	359321320	POC1 centriolar protein homolog B	1.38964		399	345806042	arrestin domain-containing protein 1	1.05634		399	345794001	phosphatase and actin regulator 4	1.58042
400	345804052	stonin-2	1.3889		400	50979052	annexin A13	1.05239		400	114326367	ras-related protein Rab-27A	1.57975
401	359320530	RAB21, member RAS oncogene family, partial	1.37722		401	345794106	cAMP-specific 3',5'-cyclic phosphodiesterase 4D isoform 2	1.04045		401	73946761	charged multivesicular body protein 2a isoform 2	1.57382
402	73965183	coiled-coil domain-containing protein 47 isoform 1	1.3749		402	345805483	proline rich 15-like	1.03984		402	73957776	malate dehydrogenase, mitochondrial	1.55857
403	73961473	Golgi resident protein GCP60	1.37135		403	50979136	sodium/potassium-transporting ATPase subunit alpha-1 precursor	1.03976		403	375065844	heterogeneous nuclear ribonucleoprotein K	1.53771
404	345782271	kinase D-interacting substrate of 220 kDa isoform 1	1.37064		404	73996826	plakophilin-2 isoform 1	1.03595		404	114326313	NADH-cytochrome b5 reductase 3	1.53108
405	345777025	probable ATP-dependent RNA helicase DDX17 isoform 11	1.35784		405	359320381	flotillin-2-like	1.03		405	345797874	sodium/potassium-transporting ATPase subunit alpha-2 isoform 1	1.52386
406	212276025	phosphatidylinositol-4-phosphate 5-kinase type-1 alpha	1.35717		406	345787601	coiled-coil domain-containing protein 124 isoform 1	1.02755		406	345790800	arf-GAP with GTPase, ANK repeat and PH domain-containing protein 1	1.5144
407	57097443	GTP-binding protein Rheb	1.3367		407	50978988	receptor tyrosine-protein kinase erbB-2 precursor	1.01337		407	73961165	uncharacterized protein C1orf21	1.49713
408	73955689	syntaxin-8 isoform 1	1.33427		408	74001695	heterogeneous nuclear ribonucleoprotein D0 isoform 2	1.00999		408	345800177	gamma-glutamyltransferase 6 isoform 1	1.49412
409	345777401	guanine nucleotide binding protein (G protein), beta polypeptide 2-like 1 isoform 1	1.33243		409	345791055	SEC14-like protein 2 isoform 1	1.00586		409	345779148	protein EFR3 homolog A	1.48691
410	73949070	uncharacterized protein LOC607279	1.31759		410	345791621	prohibitin-2	1.00212		410	73968671	fibroblast growth factor receptor substrate 2 isoform 1	1.48569
411	345799601	ubiquitin-conjugating enzyme E2 N-like	1.31759		411	73946134	A-kinase anchor protein 12	1.00176		411	73982680	liprin-alpha-1 isoform 2	1.48044
412	73948986	signal transducing adapter molecule 1	1.31258		412	345780758	nuclease-sensitive element-binding protein 1-like	1.00141		412	73980394	protein disulfide-isomerase A6	1.47631
413	57098957	protein FAM63A	1.30821		413	73968311	proliferation-associated protein 2G4	1.00038		413	345799951	alpha-crystallin B chain isoform 5	1.47312
414	73992732	ADP-ribosylation factor GTPase-activating protein 1	1.30436		414	356461051	glutathione S-transferase pi 1	0.985796		414	345782658	sorting nexin-27 isoform 3	1.4715
415	345807452	nucleophosmin-like	1.29767		415	73983543	nucleosome assembly protein 1-like 4	0.985269		415	359322424	alpha-parvin	1.47124
416	356461051	glutathione S-transferase pi 1	1.27594		416	359321834	epidermal growth factor receptor kinase substrate 8-like protein 2-like	0.981594		416	73974563	DEP domain-containing mTOR-interacting protein	1.46945
417	345777955	lamin-B1	1.27398		417	345794843	leucine-rich repeat-containing protein 57	0.979082		417	345781710	ras-related protein O-RAL-like	1.46208
418	73981228	thioredoxin-interacting protein isoform 2	1.2728		418	57098733	cold shock domain-containing protein E1 isoform 5	0.975233		418	345776760	ADP-ribosylation factor GTPase-activating protein 3	1.4565
419	345778505	uncharacterized protein LOC100688057	1.26826		419	345777498	MOB kinase activator 3B	0.974196		419	359320524	surfeit locus protein 6-like	1.45584
420	359323661	CDGSH iron-sulfur domain-containing protein 2-like	1.25316		420	359319708	ubiquitin domain-containing protein UBFD1 isoform 5	0.972594		420	73989909	dolichyl-diphosphooligosaccharide--protein glycosyltransferase subunit STT3B isoform 14	1.45001
421	345792081	vesicle-associated membrane protein 1	1.25214		421	57108515	tropomodulin-3 isoform 1	0.971586		421	50978964	tight junction protein ZO-3	1.44611
422	73971644	ras-related protein Rab-14 isoform 1	1.24326		422	74006503	ankyrin repeat and SOCS box protein 9 isoform 3	0.96999		422	57095986	BET1 homolog	1.43897
423	50979327	equilibrative nucleoside transporter 1	1.24033		423	73963740	activator of 90 kDa heat shock protein ATPase homolog 1 isoform 1	0.969988		423	345797616	60 kDa heat shock protein, mitochondrial isoform 1	1.43505
424	73991135	leucine-rich repeat transmembrane protein FLRT3 isoform 3	1.2396		424	73945902	erythrocyte membrane protein band 4.1-like 2 isoform 2	0.965591		424	74007500	moesin isoform 2	1.39362
425	73961899	myosin regulatory light polypeptide 9-like isoform 3	1.23755		425	359320460	allograft inflammatory factor 1-like	0.962459		425	73987150	endophilin-A2 isoform 2	1.39155
426	73953093	voltage-dependent anion-selective channel protein 2 isoform 2	1.2361		426	73981228	thioredoxin-interacting protein isoform 2	0.957533		426	73993338	spartin	1.39048
427	359321332	protein NEDD1-like	1.22706		427	359318559	EPS8-like 1	0.951651		427	73950541	uncharacterized protein C1orf172 homolog	1.38627
428	57089749	small nuclear ribonucleoprotein Sm D1	1.22567		428	359320530	RAB21, member RAS oncogene family, partial	0.948851		428	73960970	secretory carrier-associated membrane protein 3 isoform 6	1.38441
429	345777942	casein kinase I isoform gamma-3 isoform 2	1.2249		429	73982861	beta-adrenergic receptor kinase 1 isoform 2	0.943059		429	345801526	TBC1 domain family member 10B-like	1.37553
430	345779148	protein EFR3 homolog A	1.22392		430	345791188	paxillin	0.941537		430	73952267	leucyl-cystinyl aminopeptidase	1.37331
431	345798781	uncharacterized protein C1orf198	1.21962		431	50979110	caveolin-1	0.93616		431	345794612	sprouty-related, EVH1 domain-containing protein 1	1.37011
432	57043233	syntaxin-12	1.21736		432	57095096	lebercilin	0.934565		432	345794779	neuroplastin	1.36119
433	345790248	thrombospondin type-1 domain-containing protein 1 isoform 1	1.21256		433	345803047	desmoglein-2	0.933867		433	73945902	erythrocyte membrane protein band 4.1-like 2 isoform 2	1.36113
434	73981685	ras-related protein Ral-A isoform 1	1.19252		434	345792829	actin-binding LIM protein 1	0.933742		434	73981184	heterogeneous nuclear ribonucleoprotein A1-like isoform 3	1.35739
435	345781882	rho-associated protein kinase 2	1.1918		435	73952568	tubulin-specific chaperone E	0.933147		435	359318559	EPS8-like 1	1.35405
436	359324023	sorting nexin-12-like	1.18446		436	73945568	uncharacterized protein LOC476211 isoform 1	0.931519		436	345806752	uncharacterized protein LOC609832	1.33833
437	345778212	ubiquitin-conjugating enzyme E2 J1 isoform 1	1.18446		437	73993338	spartin	0.926078		437	345792255	FYVE, RhoGEF and PH domain-containing protein 4 isoform 1	1.32638
438	345785973	lysophospholipid acyltransferase 7 isoform 2	1.16867		438	61316477	F-actin-capping protein subunit alpha-2	0.920105		438	359320884	ATP-binding cassette sub-family F member 1	1.32419
439	345784772	golgi-associated PDZ and coiled-coil motif-containing protein	1.16479		439	57109920	DNA-directed RNA polymerases I, II, and III subunit RPABC3	0.915585		439	50978734	heat shock 70 kDa protein 1	1.32389
440	73970013	cytoplasmic protein NCK2	1.16258		440	345797874	sodium/potassium-transporting ATPase subunit alpha-2 isoform 1	0.910681		440	61316477	F-actin-capping protein subunit alpha-2	1.32339
441	57109920	DNA-directed RNA polymerases I, II, and III subunit RPABC3	1.15832		441	57088975	calcyclin-binding protein	0.908634		441	345795148	pyruvate kinase isozymes M1/M2 isoform 3	1.31222
442	345785027	numb homolog (Drosophila)-like	1.14574		442	73986648	PDZ domain-containing protein GIPC1	0.904525		442	359323766	alpha-2-HS-glycoprotein isoform 1	1.31131
443	73995354	coronin-1C isoform 2	1.14478		443	359323493	Down syndrome critical region protein 3	0.898782		443	73981333	alpha-endosulfine isoform 3	1.31017
444	345804995	Golgi SNAP receptor complex member 1	1.14436		444	73961231	cytosolic phospholipase A2 isoform 2	0.896019		444	114158646	cytochrome P450 4A37	1.30615
445	223556019	carbonic anhydrase 2	1.14397		445	345793151	protein FAM164A isoform 2	0.894597		445	74003058	exocyst complex component 3 isoform 3	1.30557
446	359321663	SH3 domain-containing YSC84-like protein 1-like	1.13647		446	57098957	protein FAM63A	0.894225		446	356460875	nucleophosmin	1.30442
447	73986648	PDZ domain-containing protein GIPC1	1.13254		447	73961473	Golgi resident protein GCP60	0.891968		447	359318974	FCH domain only protein 2	1.30269
448	345793181	copine-3	1.11894		448	74008200	UPF0428 protein CXorf56-like isoform 1	0.881802		448	73996826	plakophilin-2 isoform 1	1.30162
449	73990466	translocon-associated protein subunit gamma isoform 1	1.10953		449	73968236	phosducin-like	0.880605		449	345783668	uncharacterized protein LOC100688321	1.3003
450	345784192	membrane-associated progesterone receptor component 2	1.10682		450	356582418	nascent polypeptide-associated complex subunit alpha	0.8751		450	345785876	NEDD8-conjugating enzyme Ubc12	1.29627
451	345798693	erythrocyte membrane protein band 4.1 like 4A	1.1055		451	345783668	uncharacterized protein LOC100688321	0.873998		451	74001606	disco-interacting protein 2 homolog A	1.29546
452	73981496	F-actin-capping protein subunit alpha-1 isoform 2	1.10319		452	345799195	ankycorbin	0.865055		452	73968285	partner of Y14 and mago	1.29047
453	354459407	voltage-dependent anion-selective channel protein 3 isoform 2	1.10287		453	354623039	eukaryotic initiation factor 4A-I	0.864752		453	74009090	myotubularin	1.28675
454	345784649	syntaxin-binding protein 5 isoform 1	1.09791		454	73949472	putative E3 ubiquitin-protein ligase SH3RF2 isoform 3	0.863335		454	345806232	uncharacterized protein LOC608493	1.28467
455	345785187	uncharacterized protein LOC100686852	1.09563		455	345793299	uncharacterized protein C8orf37 homolog	0.862687		455	74008194	ADP/ATP translocase 2 isoform 2	1.27803
456	73950139	nuclear migration protein nudC isoform 1	1.09419		456	345794813	pseudopodium-enriched atypical kinase 1	0.861371		456	359323661	CDGSH iron-sulfur domain-containing protein 2-like	1.27619
457	73996139	heterogeneous nuclear ribonucleoprotein A1-like isoform 2	1.09227		457	345779293	transmembrane protein 33	0.847557		457	57043260	stathmin isoform 1	1.27443
458	345792255	FYVE, RhoGEF and PH domain-containing protein 4 isoform 1	1.09043		458	345777942	casein kinase I isoform gamma-3 isoform 2	0.845468		458	345778212	ubiquitin-conjugating enzyme E2 J1 isoform 1	1.27133
459	74008194	ADP/ATP translocase 2 isoform 2	1.08657		459	57088217	rho GTPase-activating protein 29 isoform 1	0.843929		459	73998802	ornithine aminotransferase, mitochondrial isoform 2	1.26927
460	57044069	wiskott-Aldrich syndrome protein family member 2 isoform 2	1.08298		460	73977652	lamina-associated polypeptide 2, isoforms beta/delta/epsilon/gamma isoform 7	0.842828		460	345795163	CD276 antigen	1.26663
461	359323735	N-alpha-acetyltransferase 50-like	1.08139		461	345806577	tensin-3, partial	0.835348		461	158819069	prohibitin	1.26249
462	57088217	rho GTPase-activating protein 29 isoform 1	1.07838		462	359320000	feline leukemia virus subgroup C receptor-related protein 1-like	0.834135		462	73988219	rho-related GTP-binding protein RhoG	1.25558
463	73949472	putative E3 ubiquitin-protein ligase SH3RF2 isoform 3	1.07716		463	73954685	coatomer subunit delta isoform 1	0.833431		463	73992732	ADP-ribosylation factor GTPase-activating protein 1	1.25452
464	74002653	rho GTPase-activating protein 31 isoform 2	1.07374		464	57098751	vesicle-trafficking protein SEC22b	0.826491		464	356461040	L-lactate dehydrogenase B chain	1.24815
465	73977882	LPS-responsive vesicle trafficking, beach and anchor containing isoform 1	1.07104		465	73997733	cell division cycle-associated protein 3	0.822263		465	359323097	uncharacterized protein LOC100684687	1.24767
466	73971168	uncharacterized protein C9orf25 isoform 4	1.05603		466	345782124	sorting nexin-17 isoform 3	0.820931		466	259490360	serpin H1 precursor	1.24462
467	57096847	arfaptin-1 isoform 1	1.03524		467	359323204	centrosomal protein of 55 kDa	0.815754		467	73993916	coiled-coil domain-containing protein 25	1.24037
468	57089637	SNARE-associated protein Snapin	1.03341		468	345782391	docking protein 1	0.807898		468	73970611	E3 ubiquitin-protein ligase MARCH3 isoform 1	1.23529
469	73954674	probable ATP-dependent RNA helicase DDX6 isoform 2	1.0279		469	345800677	alpha-enolase isoform 1	0.805381		469	359323204	centrosomal protein of 55 kDa	1.23289
470	226693371	solute carrier family 2 (facilitated glucose transporter), member 1	1.01706		470	57092723	PHD finger protein 5A	0.793507		470	50978670	serine/threonine-protein phosphatase PP1-gamma catalytic subunit	1.22978
471	345804198	protein jagged-2	1.00974		471	345785258	uncharacterized protein LOC484161	0.791349		471	345797866	pleckstrin homology domain-containing family A member 6	1.22268
472	73980642	transmembrane protein C2orf18 homolog	1.00747		472	345798379	SH3 domain-binding protein 2 isoform 1	0.788173		472	359321834	epidermal growth factor receptor kinase substrate 8-like protein 2-like	1.21774
473	73990727	ras-related protein Rap-2a	1.00551		473	50979026	tyrosine-protein kinase Yes	0.784486		473	345804402	kinectin	1.21439
474	57092723	PHD finger protein 5A	1.00388		474	345804995	Golgi SNAP receptor complex member 1	0.783142		474	73962325	golgin subfamily A member 5	1.21133
475	73960997	disintegrin and metalloproteinase domain-containing protein 15 isoform 3	1.00363		475	359324247	sodium- and chloride-dependent creatine transporter 1	0.782354		475	345787872	L-lactate dehydrogenase A chain isoform 1	1.20502
476	167860154	ketosamine-3-kinase	1.00172		476	73966090	phosphatidylinositol-5-phosphate 4-kinase type-2 beta	0.779582		476	345784805	rho GTPase-activating protein 18	1.20056
477	345802858	zinc transporter 1, partial	1.00097		477	73991940	proto-oncogene tyrosine-protein kinase Src isoform 5	0.778675		477	345778448	uncharacterized protein LOC100684170	1.19616
478	345781192	ephrin type-A receptor 1	1.00029		478	73965482	glycylpeptide N-tetradecanoyltransferase 1 isoform 1	0.77263		478	345791055	SEC14-like protein 2 isoform 1	1.19566
479	345784160	GRB2-associated-binding protein 1	0.999811		479	345795841	caspase-6 isoform 1	0.766754		479	345807059	ras-related protein Rab-2A-like	1.19318
480	160425231	myosin-9	0.996477		480	73960378	tyrosine-protein phosphatase non-receptor type 14 isoform 1	0.7649		480	345804770	lethal(2) giant larvae protein homolog 2	1.1928
481	359321643	integrin beta-1-binding protein 1-like isoform 2	0.996024		481	73997236	adaptin ear-binding coat-associated protein 1 isoform 1	0.761354		481	73989867	N-acylneuraminate-9-phosphatase	1.17598
482	73968285	partner of Y14 and mago	0.988407		482	73977708	ADP-ribosylation factor-like 1 isoform 1	0.752422		482	73956458	pleckstrin homology domain-containing family N member 1	1.17478
483	73987150	endophilin-A2 isoform 2	0.986993		483	73960652	protein-associating with the carboxyl-terminal domain of ezrin isoform 1	0.748939		483	73955689	syntaxin-8 isoform 1	1.17355
484	57098751	vesicle-trafficking protein SEC22b	0.981495		484	345797866	pleckstrin homology domain-containing family A member 6	0.746575		484	73982159	N-acetyltransferase 10 isoform 1	1.16887
485	50979066	signal recognition particle 72 kDa protein	0.975375		485	326693963	ubiquitin-conjugating enzyme E2 variant 2	0.743913		485	74009724	peptidyl-prolyl cis-trans isomerase A	1.16664
486	345805450	coiled-coil domain-containing protein 43	0.969042		486	73984948	coatomer subunit gamma	0.743552		486	50978812	transferrin receptor protein 1	1.16233
487	359323640	osteopontin	0.96704		487	345803175	actin-related protein 2/3 complex subunit 5	0.740064		487	345791226	uncharacterized protein C5orf52-like	1.15874
488	359321786	rho-related GTP-binding protein RhoD isoform 1	0.963188		488	73975746	cyclin-dependent kinase 14 isoform 3	0.739107		488	345782391	docking protein 1	1.15781
489	345794813	pseudopodium-enriched atypical kinase 1	0.962155		489	359319255	F-box only protein 4-like	0.738412		489	345804976	serine/threonine-protein kinase TAO1 isoform 3	1.15529
490	359323991	kin of IRRE-like protein 1	0.961769		490	345805248	E3 ubiquitin/ISG15 ligase TRIM25	0.737325		490	73998572	leucine-rich repeat protein SHOC-2 isoform 1	1.14053
491	345780758	nuclease-sensitive element-binding protein 1-like	0.958249		491	73982446	ADP-ribosylation factor GTPase-activating protein 2 isoform 1	0.725526		491	345795711	tyrosine-protein phosphatase non-receptor type 13 isoform 2	1.13609
492	345789341	eukaryotic translation initiation factor 2A	0.956527		492	74004700	uncharacterized protein LOC608074 isoform 11	0.725308		492	57096847	arfaptin-1 isoform 1	1.13249
493	359320124	glia maturation factor beta-like	0.949616		493	50950181	hepatocyte growth factor receptor precursor	0.717192		493	73956108	A-kinase anchor protein 10, mitochondrial	1.11571
494	50979138	sodium- and chloride-dependent taurine transporter	0.947569		494	359322142	elongation factor 2	0.707835		494	73948986	signal transducing adapter molecule 1	1.10515
495	73968039	target of rapamycin complex 2 subunit MAPKAP1 isoform 3	0.942474		495	345799821	tubulin folding cofactor E-like	0.707283		495	359318495	protein-L-isoaspartate(D-aspartate) O-methyltransferase	1.10195
496	345805550	leucine-rich repeat-containing protein 59	0.93963		496	345784453	ras-related protein Rab-27B	0.705604		496	345780228	metastasis-associated in colon cancer protein 1	1.10148
497	345791046	TBC1 domain family member 10A isoform 2	0.939446		497	345806239	endothelial differentiation-related factor 1	0.704797		497	212276034	26S proteasome non-ATPase regulatory subunit 4	1.09967
498	345794106	cAMP-specific 3',5'-cyclic phosphodiesterase 4D isoform 2	0.938953		498	345788596	suppressor of G2 allele of SKP1 homolog	0.703557		498	345802027	elongation factor Tu, mitochondrial	1.09688
499	345805812	intraflagellar transport protein 20 homolog isoform 2	0.932809		499	73987612	basigin	0.700792		499	345785027	numb homolog (Drosophila)-like	1.09511
500	73976082	heterogeneous nuclear ribonucleoproteins A2/B1 isoform 3	0.932645		500	356460984	eukaryotic peptide chain release factor subunit 1	0.696035		500	345796060	RAB, member of RAS oncogene family-like 3	1.09499
501	359319856	proline/serine-rich coiled-coil protein 1	0.930581		501	73949070	uncharacterized protein LOC607279	0.694319		501	308044530	ras-related protein Rab-9A	1.08939
502	359323938	nucleolar protein 58-like	0.929975		502	73955238	yorkie homolog	0.692918		502	359320831	talin-1-like	1.08206
503	356991189	diphosphoinositol polyphosphate phosphohydrolase 1	0.924626		503	345781917	intersectin-2 isoform 2	0.68657		503	73949796	mimitin, mitochondrial	1.07993
504	345804250	sec1 family domain-containing protein 1 isoform 2	0.924022		504	345807429	immunoglobulin-binding protein 1 isoform 1	0.684842		504	73976082	heterogeneous nuclear ribonucleoproteins A2/B1 isoform 3	1.07969
505	73957738	eukaryotic translation initiation factor 4H	0.922083		505	345791046	TBC1 domain family member 10A isoform 2	0.679374		505	73972761	TBC1 domain family member 22B	1.07909
506	345781806	sorbin and SH3 domain-containing protein 2 isoform 4	0.921188		506	217416483	erythrocyte band 7 integral membrane protein	0.679242		506	50979317	protein transport protein Sec61 subunit beta	1.07676
507	57108515	tropomodulin-3 isoform 1	0.920589		507	169790794	cation-independent mannose-6-phosphate receptor precursor	0.674174		507	73990727	ras-related protein Rap-2a	1.0739
508	169790794	cation-independent mannose-6-phosphate receptor precursor	0.917709		508	57031775	sorting nexin-9	0.67115		508	345791621	prohibitin-2	1.07033
509	345782496	uncharacterized protein LOC606814	0.916586		509	212276025	phosphatidylinositol-4-phosphate 5-kinase type-1 alpha	0.669153		509	345793135	junctophilin-1 isoform 1	1.06609
510	359321834	epidermal growth factor receptor kinase substrate 8-like protein 2-like	0.915965		510	73987574	serine/threonine-protein kinase STK11	0.666707		510	345780758	nuclease-sensitive element-binding protein 1-like	1.06514
511	73970381	heterogeneous nuclear ribonucleoprotein H isoform 19	0.915678		511	359323682	ADP-ribosylation factor-like 13B	0.663685		511	345785221	transmembrane protein 2 isoform 1	1.06388
512	74008079	long-chain-fatty-acid--CoA ligase 4 isoform 4	0.914964		512	345803741	VPS33B-interacting protein isoform 1	0.661472		512	73958861	pyridoxal-dependent decarboxylase domain-containing protein 1 isoform 1	1.06096
513	345779563	speriolin	0.908684		513	73964902	growth factor receptor-bound protein 2 isoform 3	0.654546		513	345802842	specifically androgen-regulated gene protein	1.06033
514	345787872	L-lactate dehydrogenase A chain isoform 1	0.905543		514	345799149	integrin alpha-2	0.65316		514	73974609	protein FAM84B-like	1.05495
515	345804278	protein FAM177A1	0.903609		515	345778962	heterogeneous nuclear ribonucleoprotein C-like 1	0.652368		515	73975874	GRIP and coiled-coil domain-containing protein 1	1.05219
516	345801919	periplakin	0.901062		516	73946549	AN1-type zinc finger protein 5 isoform 2	0.65148		516	359319033	protein LAP2-like isoform 2	1.04682
517	345796149	disks large homolog 1 isoform 2	0.898997		517	73970333	mitogen-activated protein kinase 9 isoform 3	0.651046		517	73962317	thyroid receptor-interacting protein 11	1.03532
518	73968197	family with sequence similarity 129, member B	0.893925		518	73954674	probable ATP-dependent RNA helicase DDX6 isoform 2	0.647997		518	359323342	protein LYRIC	1.0339
519	345797866	pleckstrin homology domain-containing family A member 6	0.892836		519	359323089	tensin-like C1 domain-containing phosphatase	0.640496		519	73960920	prelamin-A/C isoform 4	1.03361
520	345803741	VPS33B-interacting protein isoform 1	0.880842		520	345804148	WD repeat-containing protein 20 isoform 6	0.634592		520	345798781	uncharacterized protein C1orf198	1.02693
521	50979066	signal recognition particle 72 kDa protein	0.879896		521	345791334	density-regulated protein	0.633931		521	345794050	ephrin type-B receptor 2 isoform 2	1.01967
522	345788596	suppressor of G2 allele of SKP1 homolog	0.874105		522	345806081	78 kDa glucose-regulated protein isoform 5	0.633186		522	73969750	EH domain-binding protein 1 isoform 4	1.01489
523	345782950	epidermal growth factor receptor	0.863716		523	345784238	UBX domain-containing protein 4 isoform 1	0.6316		523	345784772	golgi-associated PDZ and coiled-coil motif-containing protein	1.01278
524	74000847	ras-related protein Rab-8B	0.863548		524	73951013	myotubularin-related protein 10 isoform 1	0.627604		524	73959885	ATP synthase subunit b, mitochondrial	1.00547
525	73981333	alpha-endosulfine isoform 3	0.83938		525	57106953	serine-threonine kinase receptor-associated protein isoform 1	0.622043		525	73958713	DCN1-like protein 3 isoform 2	1.00445
526	345799464	cytoplasmic FMR1-interacting protein 2	0.837079		526	345776872	septin-10	0.621338		526	345801654	calponin-3	0.997809
527	345802842	specifically androgen-regulated gene protein	0.83296		527	345788408	rho GTPase-activating protein 42	0.617918		527	359320183	proteasome subunit beta type-5-like	0.995344
528	359324311	uridine phosphorylase 1-like	0.82998		528	73957776	malate dehydrogenase, mitochondrial	0.614493		528	73986648	PDZ domain-containing protein GIPC1	0.994582
529	73962325	golgin subfamily A member 5	0.829069		529	345805550	leucine-rich repeat-containing protein 59	0.610865		529	74001475	C2 domain-containing protein 2	0.985069
530	73996743	twinfilin-1 isoform 1	0.824229		530	345799464	cytoplasmic FMR1-interacting protein 2	0.60802		530	226693371	solute carrier family 2 (facilitated glucose transporter), member 1	0.98313
531	73977708	ADP-ribosylation factor-like 1 isoform 1	0.81916		531	359320043	sorting nexin-6	0.60555		531	359320981	heat shock protein HSP 90-beta isoform 1	0.982871
532	345779559	protein scribble homolog, partial	0.81696		532	356460875	nucleophosmin	0.601656		532	345793331	partitioning defective 3 homolog isoform 1	0.982871
533	345780013	staphylococcal nuclease domain-containing protein 1	0.816616		533	57110955	uncharacterized protein LOC478881 isoform 1	0.599614		533	73976072	oxysterol-binding protein-related protein 3 isoform 10	0.981326
534	359319522	tRNA pseudouridine synthase-like 1-like	0.81535		534	359323018	ubiquitin fusion degradation protein 1 homolog	0.592555		534	57085091	GTP-binding protein SAR1a isoform 2	0.981078
535	74006873	uncharacterized protein LOC609457 isoform 2	0.810826		535	345806030	protein FAM102A isoform 1	0.589655		535	73954811	radixin isoform 1	0.974855
536	345798927	activated RNA polymerase II transcriptional coactivator p15-like	0.804637		536	73950940	6-phosphogluconate dehydrogenase, decarboxylating isoform 1	0.58769		536	345789453	ADP-ribosylation factor-related protein 1	0.967503
537	73993950	integral membrane protein 2C isoform 4	0.804129		537	57087587	thyroid receptor-interacting protein 6 isoform 1	0.584547		537	212549677	catenin beta-1	0.9672
538	345776872	septin-10	0.800563		538	345798691	adenomatous polyposis coli protein isoform 1	0.579329		538	345799913	cell adhesion molecule 1 isoform 1	0.964057
539	359324038	synaptotagmin-like 4	0.796185		539	345799503	ras GTPase-activating protein-binding protein 1 isoform 4	0.570843		539	345797440	partitioning defective 3 homolog B isoform 2	0.962623
540	345783183	1-phosphatidylinositol-4,5-bisphosphate phosphodiesterase beta-3	0.793591		540	345800532	beta-arrestin-2 isoform 2	0.570379		540	359322978	14-3-3 protein eta	0.961426
541	345778076	catenin alpha-1 isoform 4	0.785158		541	345793425	rho GTPase-activating protein 21	0.567297		541	73955410	proteasome subunit beta type-6	0.955436
542	345799165	AP-3 complex subunit mu-1 isoform 2	0.781322		542	359323991	kin of IRRE-like protein 1	0.566254		542	345806042	arrestin domain-containing protein 1	0.952485
543	73975763	krev interaction trapped protein 1 isoform 1	0.777807		543	345804262	HEAT repeat-containing protein 5A isoform 2	0.559791		543	345781474	zyxin	0.949768
544	359320670	ras-related C3 botulinum toxin substrate 2	0.775665		544	73973000	tight junction-associated protein 1 isoform 2	0.559055		544	345781882	rho-associated protein kinase 2	0.942808
545	73982446	ADP-ribosylation factor GTPase-activating protein 2 isoform 1	0.773383		545	345795753	protein FAM190A	0.555622		545	345800183	UPF0587 protein C1orf123 homolog	0.938715
546	345806081	78 kDa glucose-regulated protein isoform 5	0.765749		546	345781604	PH and SEC7 domain-containing protein 3	0.55188		546	345793444	sickle tail protein homolog isoform 1	0.934308
547	74001695	heterogeneous nuclear ribonucleoprotein D0 isoform 2	0.757938		547	345795165	UPF0583 protein C15orf59 homolog	0.551776		547	359322181	membrane-associated guanylate kinase, WW and PDZ domain-containing protein 1	0.927355
548	359323342	protein LYRIC	0.756624		548	345783183	1-phosphatidylinositol-4,5-bisphosphate phosphodiesterase beta-3	0.551459		548	73983713	protein fat-free homolog	0.92534
549	335334928	liprin-beta-1	0.75614		549	73984468	ruvB-like 1 isoform 2	0.544818		549	57100553	annexin A5	0.923533
550	345807059	ras-related protein Rab-2A-like	0.755604		550	359321320	POC1 centriolar protein homolog B	0.542539		550	73946839	epsin-1 isoform 1	0.923464
551	345782180	zinc transporter 6 isoform 1	0.755604		551	345803891	receptor-interacting serine/threonine-protein kinase 3	0.540496		551	345789341	eukaryotic translation initiation factor 2A	0.920974
552	359322717	NSFL1 cofactor p47 isoform 2	0.754131		552	345803053	kinesin family member 14	0.539301		552	354623039	eukaryotic initiation factor 4A-I	0.918332
553	345783668	uncharacterized protein LOC100688321	0.754131		553	359321663	SH3 domain-containing YSC84-like protein 1-like	0.539277		553	73999690	solute carrier family 12 member 6 isoform 9	0.917683
554	73950129	MARVEL domain-containing protein 2	0.753439		554	345798746	cytoplasmic FMR1-interacting protein 1	0.538163		554	345796073	golgin subfamily B member 1	0.917179
555	57101996	peptidyl-prolyl cis-trans isomerase NIMA-interacting 1	0.75291		555	345783041	protein phosphatase Slingshot homolog 3 isoform 1	0.537221		555	345782730	immunoglobulin superfamily member 3	0.916823
556	345797426	abl interactor 2 isoform 3	0.749146		556	50978730	frizzled-6 precursor	0.53718		556	345800677	alpha-enolase isoform 1	0.913566
557	345796461	coiled-coil domain-containing protein 50	0.746227		557	73986416	syntaxin-10 isoform 1	0.534091		557	73961057	uncharacterized protein C1orf43 homolog isoform 6	0.910216
558	359320393	WAS/WASL-interacting protein family member 2 isoform 1	0.744902		558	345796060	RAB, member of RAS oncogene family-like 3	0.529666		558	345801663	formin binding protein 1-like isoform 1	0.90886
559	345782391	docking protein 1	0.742797		559	73977460	protein phosphatase 1 regulatory subunit 12A isoform 9	0.528614		559	73963539	protein numb homolog isoform 8	0.90483
560	359323204	centrosomal protein of 55 kDa	0.740942		560	345782746	neurogenic locus notch homolog protein 2 isoform 1	0.522876		560	73983414	elongation factor 1-gamma isoform 1	0.904669
561	345807408	vesicle-associated membrane protein 7 isoform 1	0.736861		561	356460877	nuclear distribution protein nudE homolog 1	0.521295		561	345802876	torsin-1A-interacting protein 1	0.902361
562	345783819	182 kDa tankyrase-1-binding protein	0.73579		562	345781064	FYVE, RhoGEF and PH domain-containing protein 6	0.517721		562	345803467	rho-associated protein kinase 1	0.900329
563	73957943	protein BUD31 homolog isoform 2	0.731996		563	73958438	TBC1 domain family member 10B, partial	0.5167		563	73957772	huntingtin-interacting protein 1	0.896827
564	345796343	solute carrier family 12 member 7	0.730418		564	187937195	transient receptor potential cation channel subfamily V member 4	0.51292		564	359321669	d-3-phosphoglycerate dehydrogenase-like	0.896511
565	73960378	tyrosine-protein phosphatase non-receptor type 14 isoform 1	0.729859		565	359321201	basic leucine zipper and W2 domain-containing protein 2-like	0.512728		565	345780679	gap junction beta-3 protein	0.892579
566	73948884	phosphatidylinositol-5-phosphate 4-kinase type-2 alpha	0.72578		566	359318871	kinesin-1 heavy chain-like	0.506		566	345778691	serine/threonine-protein kinase 38	0.891306
567	345788015	nuclear mitotic apparatus protein 1	0.724781		567	73964695	fatty acid synthase	0.503525		567	74001080	T-complex protein 1 subunit theta isoform 1	0.886134
568	345800543	phospholipid scramblase 3	0.723473		568	73951749	SH3 domain and tetratricopeptide repeats-containing protein 1	0.503471		568	345777938	sorting nexin-2 isoform 1	0.883731
569	84579927	macoilin	0.723298		569	74007103	protein Shroom2	0.497009		569	345800374	plasminogen activator inhibitor 1 RNA-binding protein isoform 1	0.880916
570	73952267	leucyl-cystinyl aminopeptidase	0.713104		570	345789806	nucleolar protein 56	0.491682		570	50978986	syntaxin-binding protein 2	0.880851
571	345777498	MOB kinase activator 3B	0.712602		571	359319134	zinc finger FYVE domain-containing protein 16	0.487055		571	345786992	CUB domain-containing protein 1	0.878981
572	345803053	kinesin family member 14	0.707061		572	73959109	E3 ubiquitin-protein ligase TRAF7 isoform 1	0.483865		572	345782310	transmembrane protein 87B	0.87784
573	73993641	kinesin family member 13B isoform 1	0.70421		573	359324063	inositol polyphosphate 5-phosphatase OCRL-1 isoform 2	0.483602		573	50978638	thiopurine S-methyltransferase	0.877106
574	345784197	dihydrofolate reductase	0.702716		574	345791926	uncharacterized protein LOC609790	0.47806		574	74000809	electron transfer flavoprotein subunit alpha, mitochondrial isoform 1	0.876299
575	57090119	peptidyl-prolyl cis-trans isomerase FKBP3 isoform 1	0.700622		575	73999449	deubiquitinating protein VCIP135	0.477856		575	345792633	phosphoglycerate mutase 1 isoform 4	0.874807
576	359320381	flotillin-2-like	0.6938		576	345777328	reticulon-4 isoform 1	0.476203		576	345791799	eukaryotic translation initiation factor 4B isoform 14	0.87251
577	345786729	guanine nucleotide-binding protein-like 3	0.691398		577	345787549	SURP and G-patch domain-containing protein 1 isoform 3	0.475606		577	74002653	rho GTPase-activating protein 31 isoform 2	0.870508
578	212276034	26S proteasome non-ATPase regulatory subunit 4	0.688937		578	345801919	periplakin	0.474501		578	73961899	myosin regulatory light polypeptide 9-like isoform 3	0.869692
579	73984484	dolichyl-diphosphooligosaccharide--protein glycosyltransferase subunit 1 isoform 3	0.688352		579	73975490	coiled-coil-helix-coiled-coil-helix domain-containing protein 3, mitochondrial isoform 2	0.472033		579	345781604	PH and SEC7 domain-containing protein 3	0.868468
580	345794001	phosphatase and actin regulator 4	0.684623		580	345802116	protein FAM102B	0.470761		580	57089749	small nuclear ribonucleoprotein Sm D1	0.867701
581	345780950	purine nucleoside phosphorylase	0.675688		581	345801919	periplakin	0.469847		581	345807224	ras-related protein Rap-2c	0.864683
582	57088975	calcyclin-binding protein	0.67526		582	359323247	glutathione S-transferase omega-1 isoform 1	0.469412		582	345800543	phospholipid scramblase 3	0.857932
583	303228324	GTP-binding nuclear protein Ran	0.675026		583	73975991	hyccin isoform 1	0.467195		583	345782628	protein prune homolog	0.853532
584	59958375	utrophin	0.674763		584	345790248	thrombospondin type-1 domain-containing protein 1 isoform 1	0.466054		584	345781064	FYVE, RhoGEF and PH domain-containing protein 6	0.852873
585	73976579	late secretory pathway protein AVL9 homolog	0.669085		585	77404203	dystroglycan precursor	0.465289		585	345800929	NAD(P)H dehydrogenase [quinone] 1	0.850962
586	345799503	ras GTPase-activating protein-binding protein 1 isoform 4	0.665716		586	359321332	protein NEDD1-like	0.464443		586	345795838	protein transport protein Sec24B isoform 1	0.850494
587	345793151	protein FAM164A isoform 2	0.660861		587	73955189	acetyl-CoA acetyltransferase, mitochondrial	0.46228		587	356991173	AP-3 complex subunit sigma-2	0.847981
588	345782539	Na(+)/H(+) exchange regulatory cofactor NHE-RF3 isoform 1	0.659023		588	345798988	vinculin	0.461209		588	73997169	probable ATP-dependent RNA helicase DDX47 isoform 2	0.847667
589	345783305	vacuolar protein sorting-associated protein 37C	0.644486		589	345786212	LIM and cysteine-rich domains protein 1	0.460277		589	73982861	beta-adrenergic receptor kinase 1 isoform 2	0.84637
590	345782658	sorting nexin-27 isoform 3	0.642125		590	73950355	anamorsin	0.452817		590	73999414	protein FAM110B-like	0.839834
591	345788600	RAP2A, member of RAS oncogene family	0.640885		591	345788661	LIM domain only protein 7	0.449882		591	359320163	heat shock protein HSP 90-alpha isoform 1	0.824752
592	57110216	p21-activated protein kinase-interacting protein 1	0.63951		592	73972761	TBC1 domain family member 22B	0.446882		592	345791334	density-regulated protein	0.822984
593	345797318	fibronectin	0.637787		593	74001687	BMP-2-inducible protein kinase isoform 1	0.446234		593	73956140	fatty aldehyde dehydrogenase	0.821249
594	345796060	RAB, member of RAS oncogene family-like 3	0.635058		594	345779124	protein FAM91A1	0.440767		594	335334928	liprin-beta-1	0.821245
595	345798746	cytoplasmic FMR1-interacting protein 1	0.633376		595	73987338	cold-inducible RNA-binding protein isoform 4	0.439284		595	73973000	tight junction-associated protein 1 isoform 2	0.819912
596	73956458	pleckstrin homology domain-containing family N member 1	0.632917		596	74000783	testis-expressed sequence 9 protein	0.438136		596	166796110	ephrin-B2	0.818371
597	345797675	junctional adhesion molecule A	0.62681		597	345791623	tyrosine-protein phosphatase non-receptor type 6	0.437307		597	345796343	solute carrier family 12 member 7	0.817831
598	114326369	interferon-induced, double-stranded RNA-activated protein kinase	0.624585		598	73945886	enoyl-CoA hydratase domain-containing protein 1 isoform 1	0.43053		598	73964083	MAP/microtubule affinity-regulating kinase 3 isoform 4	0.817827
599	73949796	mimitin, mitochondrial	0.622766		599	158819069	prohibitin	0.43053		599	345777399	AP-3 complex subunit sigma-1-like isoform 3	0.817516
600	73960920	prelamin-A/C isoform 4	0.616602		600	345800171	non-receptor tyrosine-protein kinase TNK1	0.428443		600	73948926	MAGUK p55 subfamily member 7	0.814975
601	74000257	transmembrane protein 87A	0.615088		601	359322257	ran-binding protein 3 isoform 1	0.428153		601	345791623	tyrosine-protein phosphatase non-receptor type 6	0.811736
602	359323950	carboxy-terminal domain RNA polymerase II polypeptide A small phosphatase 1-like	0.612938		602	359320981	heat shock protein HSP 90-beta isoform 1	0.426592		602	73955238	yorkie homolog	0.80833
603	73967208	transmembrane protein 199	0.612938		603	359320098	serine/threonine-protein kinase MRCK beta isoform 2	0.426266		603	345780684	gap junction beta-4 protein	0.805425
604	345805116	dual specificity protein phosphatase 3	0.612834		604	345777370	malate dehydrogenase, cytoplasmic	0.425633		604	73992699	solute carrier organic anion transporter family member 4A1	0.805225
605	345777345	serine/threonine-protein kinase VRK2	0.612834		605	345785221	transmembrane protein 2 isoform 1	0.418798		605	345798374	alpha-adducin	0.801151
606	50978782	pro-epidermal growth factor precursor	0.610549		606	73970067	thioredoxin domain-containing protein 9	0.417696		606	359318893	ras-related protein Rab-18 isoform 2	0.79807
607	57098733	cold shock domain-containing protein E1 isoform 5	0.607975		607	73993705	dihydropyrimidinase-related protein 2 isoform 6	0.416156		607	345788952	protein CDV3 homolog	0.790565
608	73999414	protein FAM110B-like	0.604599		608	73998572	leucine-rich repeat protein SHOC-2 isoform 1	0.415459		608	73995354	coronin-1C isoform 2	0.789584
609	345780321	pituitary adenylate cyclase-activating polypeptide type I receptor isoform 2	0.604483		609	345800543	phospholipid scramblase 3	0.414996		609	57109920	DNA-directed RNA polymerases I, II, and III subunit RPABC3	0.785347
610	345796392	vacuolar protein sorting-associated protein 8 homolog isoform 3	0.603651		610	74002653	rho GTPase-activating protein 31 isoform 2	0.411037		610	345802928	TIP41-like protein	0.780695
611	359321496	zinc finger CCCH-type antiviral protein 1-like	0.597511		611	73954361	myotubularin-related protein 12	0.409735		611	359320572	extended synaptotagmin-1	0.777561
612	73954719	transgelin isoform 1	0.595522		612	223278420	DNA-(apurinic or apyrimidinic site) lyase	0.402546		612	359319819	protein ITFG3	0.773441
613	345781890	HCLS1-binding protein 3	0.59221		613	345782950	epidermal growth factor receptor	0.398698		613	73982024	blocked early in transport 1 homolog (S. cerevisiae)-like isoform 1	0.770863
614	73974379	exostosin-1 isoform 1	0.584334		614	359320393	WAS/WASL-interacting protein family member 2 isoform 1	0.397805		614	345805692	ubiquitin carboxyl-terminal hydrolase 32 isoform 1	0.757116
615	345785258	uncharacterized protein LOC484161	0.582361		615	259490360	serpin H1 precursor	0.395466		615	50979066	signal recognition particle 72 kDa protein	0.756476
616	73959861	protein wntless homolog isoform 3	0.580464		616	345802876	torsin-1A-interacting protein 1	0.395163		616	359319255	F-box only protein 4-like	0.754791
617	345795165	UPF0583 protein C15orf59 homolog	0.580464		617	73962685	rho GTPase-activating protein 5 isoform 1	0.391409		617	345787832	ras-related protein R-Ras2	0.752514
618	345804978	serine/threonine-protein kinase TAO1	0.579486		618	345784192	membrane-associated progesterone receptor component 2	0.390821		618	345783052	spectrin beta chain, brain 2 isoform 1	0.750927
619	57031775	sorting nexin-9	0.576291		619	359322424	alpha-parvin	0.389338		619	73950940	6-phosphogluconate dehydrogenase, decarboxylating isoform 1	0.747321
620	359323018	ubiquitin fusion degradation protein 1 homolog	0.575997		620	73961312	desmocollin-2 isoform 3	0.385696		620	73961312	desmocollin-2 isoform 3	0.746749
621	345802876	torsin-1A-interacting protein 1	0.573565		621	66472883	podocalyxin precursor	0.383865		621	359323905	integrin alpha-6-like	0.742907
622	73988944	protein lin-7 homolog C	0.572876		622	359323342	protein LYRIC	0.381448		622	359318694	tubulin-folding cofactor B	0.742509
623	345782124	sorting nexin-17 isoform 3	0.572876		623	345791123	acetoacetyl-CoA synthetase	0.380828		623	345796149	disks large homolog 1 isoform 2	0.7388
624	359318871	kinesin-1 heavy chain-like	0.568892		624	50978782	pro-epidermal growth factor precursor	0.377532		624	73988716	protein kinase C delta-binding protein	0.73691
625	308082020	triosephosphate isomerase	0.567816		625	57095314	eukaryotic translation initiation factor 3 subunit H isoform 1	0.375307		625	345804052	stonin-2	0.722399
626	73986416	syntaxin-10 isoform 1	0.56186		626	345792255	FYVE, RhoGEF and PH domain-containing protein 4 isoform 1	0.374184		626	345787655	epidermal growth factor receptor pathway substrate 15-like 1 isoform 2	0.722139
627	345781917	intersectin-2 isoform 2	0.559244		627	73978290	rho GTPase-activating protein 10	0.372306		627	345803047	desmoglein-2	0.716438
628	73980577	flap endonuclease GEN homolog 1	0.558696		628	73996688	LIM domain and actin-binding protein 1	0.371299		628	74002468	TBC1 domain family member 23 isoform 2	0.713775
629	345803467	rho-associated protein kinase 1	0.557845		629	359320368	polymerase I and transcript release factor-like	0.366343		629	345798476	protocadherin-7	0.710898
630	74009090	myotubularin	0.557282		630	55742764	serum albumin precursor	0.362987		630	73959826	E3 ubiquitin-protein ligase CHIP	0.701132
631	57098115	14-3-3 protein theta isoform 1	0.554763		631	73987978	protein phosphatase methylesterase 1 isoform 4	0.361882		631	356460939	transcription factor BTF3	0.69934
632	217416483	erythrocyte band 7 integral membrane protein	0.554763		632	73958967	protein C16orf88 homolog	0.359144		632	345781806	sorbin and SH3 domain-containing protein 2 isoform 4	0.698247
633	50950181	hepatocyte growth factor receptor precursor	0.551192		633	73973002	DNA polymerase eta	0.353153		633	77404203	dystroglycan precursor	0.694552
634	73962317	thyroid receptor-interacting protein 11	0.547557		634	345778040	core histone macro-H2A.1 isoform 1	0.353111		634	73953207	annexin A8 isoform 1	0.687191
635	50978986	syntaxin-binding protein 2	0.544162		635	345802726	ATP synthase subunit alpha, mitochondrial isoform 2	0.352393		635	74007567	disks large homolog 3 isoform 4	0.679277
636	345792829	actin-binding LIM protein 1	0.542361		636	73977692	SCY1-like protein 2 isoform 2	0.350888		636	345805450	coiled-coil domain-containing protein 43	0.678694
637	50979162	signal peptidase complex subunit 2	0.54105		637	345807788	heterogeneous nuclear ribonucleoprotein H2 isoform 7	0.349194		637	73981486	monocarboxylate transporter 1 isoform 1	0.678276
638	73973002	DNA polymerase eta	0.539168		638	345783125	EH domain binding protein 1-like 1 isoform 1	0.347804		638	57100657	protein sprouty homolog 1	0.677276
639	50979054	vasodilator-stimulated phosphoprotein	0.537793		639	57044069	wiskott-Aldrich syndrome protein family member 2 isoform 2	0.347802		639	345805550	leucine-rich repeat-containing protein 59	0.671017
640	345796073	golgin subfamily B member 1	0.536965		640	73999414	protein FAM110B-like	0.345227		640	345777942	casein kinase I isoform gamma-3 isoform 2	0.667609
641	73973000	tight junction-associated protein 1 isoform 2	0.536965		641	73955189	acetyl-CoA acetyltransferase, mitochondrial	0.34429		641	73981543	vacuolar protein sorting-associated protein 45	0.666658
642	345777117	target of Myb protein 1	0.535063		642	73948982	tRNA (cytosine(38)-C(5))-methyltransferase isoform 2	0.343712		642	51339016	guanine nucleotide-binding protein G(t) subunit alpha-1	0.666124
643	74008200	UPF0428 protein CXorf56-like isoform 1	0.532361		643	73952267	leucyl-cystinyl aminopeptidase	0.34228		643	223278420	DNA-(apurinic or apyrimidinic site) lyase	0.664955
644	345798374	alpha-adducin	0.528013		644	345796880	leucine-rich repeat-containing protein 16A isoform 1	0.342189		644	73973141	dystonin isoform 15	0.65733
645	345777938	sorting nexin-2 isoform 1	0.527733		645	359320163	heat shock protein HSP 90-alpha isoform 1	0.342169		645	345803210	ras GTPase-activating protein nGAP	0.649926
646	73950355	anamorsin	0.524613		646	50978986	syntaxin-binding protein 2	0.340356		646	345800827	probable palmitoyltransferase ZDHHC1	0.648737
647	359318694	tubulin-folding cofactor B	0.524613		647	345799998	rho GTPase-activating protein 32	0.338859		647	345793416	abl interactor 1	0.647829
648	57087613	actin-related protein 2/3 complex subunit 1B isoform 1	0.524415		648	73956283	dual specificity mitogen-activated protein kinase kinase 3	0.338692		648	73964067	eukaryotic translation initiation factor 5 isoform 4	0.647764
649	345784329	serpin B12	0.524415		649	73983948	ankyrin repeat domain-containing protein 50 isoform 1	0.337351		649	74005199	neuropilin-2 isoform 1	0.647635
650	345795148	pyruvate kinase isozymes M1/M2 isoform 3	0.523284		650	345778489	CD2-associated protein	0.337005		650	73957738	eukaryotic translation initiation factor 4H	0.644502
651	74000468	sorting nexin-1 isoform 4	0.523284		651	73976072	oxysterol-binding protein-related protein 3 isoform 10	0.336669		651	345803242	peroxiredoxin-6	0.64434
652	345791623	tyrosine-protein phosphatase non-receptor type 6	0.523114		652	359322869	vigilin isoform 3	0.335888		652	345796436	lipoma-preferred partner isoform 1	0.643659
653	359318859	FERM domain-containing protein 3	0.521761		653	345777025	probable ATP-dependent RNA helicase DDX17 isoform 11	0.334346		653	73957083	IST1 homolog isoform 1	0.643383
654	73962685	rho GTPase-activating protein 5 isoform 1	0.518972		654	345795148	pyruvate kinase isozymes M1/M2 isoform 3	0.333945		654	326693963	ubiquitin-conjugating enzyme E2 variant 2	0.642334
655	73974180	14-3-3 protein zeta/delta isoform 2	0.518972		655	73980394	protein disulfide-isomerase A6	0.333273		655	345801243	14-3-3 protein gamma	0.639732
656	359319255	F-box only protein 4-like	0.516197		656	73974609	protein FAM84B-like	0.325948		656	345788986	phospholipid scramblase 4	0.638094
657	167736402	zinc finger CCCH domain-containing protein 15	0.512574		657	73962325	golgin subfamily A member 5	0.323327		657	57092489	lysozyme	0.63665
658	57085045	phytanoyl-CoA 2-hydroxylase interacting protein-like	0.511686		658	73955990	epsin-2 isoform 1	0.322146		658	167860154	ketosamine-3-kinase	0.63603
659	345802354	vasorin	0.510377		659	73989058	WW domain-binding protein 4 isoform 1	0.318607		659	345796179	poliovirus receptor-related protein 3	0.634188
660	73958438	TBC1 domain family member 10B, partial	0.508528		660	73958861	pyridoxal-dependent decarboxylase domain-containing protein 1 isoform 1	0.318129		660	73987813	synaptotagmin-like 2 isoform 3	0.631143
661	345791188	paxillin	0.503736		661	345795809	glutathione S-transferase C-terminal domain-containing protein isoform 2	0.318009		661	345788793	integral membrane protein 2B	0.626606
662	74007756	UPF0368 protein Cxorf26-like isoform 1	0.503736		662	345790747	bridging integrator 3	0.315599		662	345795005	myosin-Ie	0.625587
663	73976072	oxysterol-binding protein-related protein 3 isoform 10	0.503609		663	345782496	uncharacterized protein LOC606814	0.314312		663	57089975	tandem C2 domains nuclear protein isoform 1	0.625578
664	345801474	MICAL-like 2	0.492444		664	359323163	uncharacterized protein KIAA0528-like isoform 1	0.312765		664	359321201	basic leucine zipper and W2 domain-containing protein 2-like	0.617929
665	345804770	lethal(2) giant larvae protein homolog 2	0.492416		665	359319282	SH3 and PX domain-containing protein 2B, partial	0.309652		665	308081835	cytochrome c	0.616691
666	50978730	frizzled-6 precursor	0.488301		666	359319806	Na(+)/H(+) exchange regulatory cofactor NHE-RF2 isoform 1	0.308824		666	345800040	signal recognition particle receptor subunit alpha-like	0.615786
667	73979580	ADP/ATP translocase 1	0.487997		667	345799212	disks large homolog 5	0.308601		667	73986266	trans-2,3-enoyl-CoA reductase isoform 2	0.613657
668	73982080	estradiol 17-beta-dehydrogenase 12 isoform 2	0.486945		668	73987830	teneurin-4 isoform 4	0.306235		668	345786886	transketolase	0.607824
669	73962301	legumain isoform 1	0.485748		669	345790530	E3 ubiquitin-protein ligase SH3RF1 isoform 3	0.305015		669	73960795	serine/threonine-protein kinase MRCK alpha isoform 5	0.606331
670	73952568	tubulin-specific chaperone E	0.484255		670	73963483	signal-induced proliferation-associated 1 like 1 isoform 1	0.303054		670	73946150	VIP peptides	0.605678
671	345788952	protein CDV3 homolog	0.481594		671	345802949	heterogeneous nuclear ribonucleoprotein U isoform 1	0.301797		671	359320098	serine/threonine-protein kinase MRCK beta isoform 2	0.602509
672	74007162	nance-Horan syndrome protein isoform 2	0.480258		672	345802354	vasorin	0.298717		672	73957980	arf-GAP domain and FG repeats-containing protein 2	0.597251
673	57095314	eukaryotic translation initiation factor 3 subunit H isoform 1	0.474808		673	345800959	protein arginine N-methyltransferase 7	0.297565		673	345784000	oxysterol-binding protein-related protein 5	0.597126
674	345797085	protein FAM171B	0.471237		674	345798362	actin filament-associated protein 1 isoform 1	0.297179		674	50979014	calnexin precursor	0.596185
675	345795898	inactive ubiquitin carboxyl-terminal hydrolase 53	0.468091		675	345788015	nuclear mitotic apparatus protein 1	0.297139		675	345796185	pleckstrin homology-like domain, family B, member 2 isoform 1	0.595224
676	73963740	activator of 90 kDa heat shock protein ATPase homolog 1 isoform 1	0.466404		676	73983713	protein fat-free homolog	0.294454		676	57110216	p21-activated protein kinase-interacting protein 1	0.593508
677	345790868	BRCA1-associated protein	0.466224		677	359323938	nucleolar protein 58-like	0.293846		677	345780013	staphylococcal nuclease domain-containing protein 1	0.588589
678	359320884	ATP-binding cassette sub-family F member 1	0.465573		678	74001606	disco-interacting protein 2 homolog A	0.293321		678	74006748	peripheral plasma membrane protein CASK isoform 4	0.583905
679	73958713	DCN1-like protein 3 isoform 2	0.464081		679	73981543	vacuolar protein sorting-associated protein 45	0.293271		679	74007339	protein XRP2	0.583905
680	73945902	erythrocyte membrane protein band 4.1-like 2 isoform 2	0.462429		680	345777949	GRAM domain-containing protein 3 isoform 2	0.292339		680	73980329	charged multivesicular body protein 3 isoform 1	0.581602
681	345805248	E3 ubiquitin/ISG15 ligase TRIM25	0.459299		681	73997538	ELKS/Rab6-interacting/CAST family member 1 isoform 8	0.291339		681	345796017	discoidin, CUB and LCCL domain-containing protein 2	0.575913
682	73999148	YTH domain family protein 3 isoform 9	0.450459		682	73986746	ATP-dependent RNA helicase DDX39A	0.288298		682	73988792	liprin-beta-2	0.56882
683	73965007	envoplakin	0.450211		683	73995170	vacuolar protein sorting-associated protein 33A	0.286864		683	74002664	glycogen synthase kinase-3 beta isoform 2	0.558034
684	116829774	inactive rhomboid protein 2	0.449499		684	345799184	oncostatin-M-specific receptor subunit beta	0.284106		684	73983551	7-dehydrocholesterol reductase	0.551723
685	345800456	beta-enolase	0.448542		685	359321037	arf-GAP with SH3 domain, ANK repeat and PH domain-containing protein 1	0.281671		685	345788478	arfaptin-2 isoform 1	0.548302
686	73953207	annexin A8 isoform 1	0.444757		686	73973246	protein FAM135A isoform 9	0.281341		686	345796282	tubulin polymerization-promoting protein	0.547833
687	359323163	uncharacterized protein KIAA0528-like isoform 1	0.440771		687	73956458	pleckstrin homology domain-containing family N member 1	0.276664		687	74001695	heterogeneous nuclear ribonucleoprotein D0 isoform 2	0.547288
688	73950541	uncharacterized protein C1orf172 homolog	0.440453		688	345790755	vinexin	0.273525		688	73994175	SH3 domain-binding protein 4	0.545164
689	359319553	kelch domain-containing protein 4	0.439197		689	73986801	hsp90 co-chaperone Cdc37 isoform 2	0.263665		689	73950483	nucleolar protein of 40 kDa	0.543964
690	55742764	serum albumin precursor	0.438284		690	73970756	protein transport protein Sec24A isoform 2	0.261393		690	345802726	ATP synthase subunit alpha, mitochondrial isoform 2	0.541824
691	74009203	H/ACA ribonucleoprotein complex subunit 4	0.438251		691	345796073	golgin subfamily B member 1	0.260365		691	74005918	SLIT-ROBO Rho GTPase-activating protein 2 isoform 3	0.537465
692	73965766	signal transducer and activator of transcription 3 isoform 1	0.435796		692	345804198	protein jagged-2	0.260042		692	73970888	stress-70 protein, mitochondrial isoform 6	0.536254
693	359322118	DENN domain-containing protein 1C-like	0.435348		693	73991183	protein jagged-1 isoform 1	0.259945		693	73964226	vesicle transport through interaction with t-SNAREs homolog 1B	0.534168
694	73981543	vacuolar protein sorting-associated protein 45	0.434988		694	345777987	rap guanine nucleotide exchange factor 6 isoform 4	0.259556		694	336455146	transforming protein RhoA precursor	0.532899
695	345800417	inaD-like protein isoform 3	0.43284		695	73974722	plectin isoform 7	0.257482		695	345794865	protein disulfide-isomerase A3	0.529887
696	345798207	stromal interaction molecule 2	0.431487		696	74007807	phosphoglycerate kinase 1 isoform 2	0.256399		696	345784160	GRB2-associated-binding protein 1	0.526057
697	345786318	synapsin-2	0.430234		697	74000661	AP-4 complex subunit epsilon-1	0.254251		697	345793299	uncharacterized protein C8orf37 homolog	0.52512
698	359320383	dehydrogenase/reductase SDR family member 13-like	0.427118		698	359323544	protein SON-like isoform 2	0.253894		698	57088975	calcyclin-binding protein	0.519924
699	73965401	ELAV-like protein 1-like	0.42343		699	345777938	sorting nexin-2 isoform 1	0.250139		699	345788015	nuclear mitotic apparatus protein 1	0.518067
700	345791129	scavenger receptor class B member 1	0.423372		700	73945607	ralBP1-associated Eps domain-containing protein 1 isoform 4	0.248711		700	345805248	E3 ubiquitin/ISG15 ligase TRIM25	0.514187
701	73970333	mitogen-activated protein kinase 9 isoform 3	0.423323		701	345801474	MICAL-like 2	0.241951		701	307938283	guanine nucleotide-binding protein G(q) subunit alpha	0.512314
702	345799195	ankycorbin	0.422569		702	345778161	cytochrome b5 reductase 4	0.241156		702	73972878	inactive tyrosine-protein kinase 7 isoform 1	0.509559
703	73992284	potassium voltage-gated channel subfamily G member 1 isoform 1	0.42163		703	57048026	cell growth-regulating nucleolar protein isoform 1	0.23942		703	50978714	Treacher Collins-Franceschetti syndrome 1	0.509131
704	74007037	melanoma-associated antigen D2 isoform 2	0.421462		704	359319416	L-aminoadipate-semialdehyde dehydrogenase-phosphopantetheinyl transferase	0.234044		704	359318637	basal cell adhesion molecule	0.506992
705	345787601	coiled-coil domain-containing protein 124 isoform 1	0.41995		705	345800504	myb-binding protein 1A isoform 4	0.232347		705	57098957	protein FAM63A	0.506239
706	345798691	adenomatous polyposis coli protein isoform 1	0.417599		706	345795306	cystathionine beta-synthase	0.231348		706	57031775	sorting nexin-9	0.502237
707	73998651	semaphorin-4G	0.417381		707	74000871	pleckstrin homology domain-containing family O member 2	0.230685		707	345788600	RAP2A, member of RAS oncogene family	0.501739
708	345790828	septin-2	0.414286		708	345792593	sorbin and SH3 domain-containing protein 1 isoform 1	0.230109		708	73993641	kinesin family member 13B isoform 1	0.501214
709	73977380	N6-adenosine-methyltransferase 70 kDa subunit isoform 1	0.412805		709	345803210	ras GTPase-activating protein nGAP	0.229255		709	50979020	guanine nucleotide-binding protein G(I)/G(S)/G(T) subunit beta-1	0.498794
710	345791822	sterol O-acyltransferase 2	0.411503		710	50978714	Treacher Collins-Franceschetti syndrome 1	0.228828		710	57110955	uncharacterized protein LOC478881 isoform 1	0.495153
711	345783052	spectrin beta chain, brain 2 isoform 1	0.410709		711	345796179	poliovirus receptor-related protein 3	0.226408		711	74007169	cyclin-dependent kinase-like 5	0.493772
712	359320043	sorting nexin-6	0.406823		712	345783091	phosphofurin acidic cluster sorting protein 1	0.225912		712	345782746	neurogenic locus notch homolog protein 2 isoform 1	0.492281
713	73951749	SH3 domain and tetratricopeptide repeats-containing protein 1	0.405583		713	73988618	phosphatidylinositol-4-phosphate 3-kinase C2 domain-containing subunit alpha isoform 1	0.225366		713	73967018	ras-related protein Rab-34 isoform 2	0.489822
714	345807695	HAUS augmin-like complex, subunit 7	0.40386		714	345777784	centlein	0.224786		714	167736402	zinc finger CCCH domain-containing protein 15	0.48944
715	74006567	SH3 domain-containing kinase-binding protein 1 isoform 2	0.403331		715	73965007	envoplakin	0.223792		715	73950139	nuclear migration protein nudC isoform 1	0.488394
716	345798857	galectin-8 isoform 1	0.402065		716	359323544	protein SON-like isoform 2	0.222308		716	345801474	MICAL-like 2	0.486708
717	73963483	signal-induced proliferation-associated 1 like 1 isoform 1	0.401836		717	345794865	protein disulfide-isomerase A3	0.219837		717	50978814	uveal autoantigen with coiled-coil domains and ankyrin repeats	0.486298
718	345792698	leucine zipper putative tumor suppressor 2	0.400389		718	74009203	H/ACA ribonucleoprotein complex subunit 4	0.218246		718	345804198	protein jagged-2	0.486042
719	359319819	protein ITFG3	0.396607		719	50950253	rhophilin-2	0.217702		719	345777025	probable ATP-dependent RNA helicase DDX17 isoform 11	0.484543
720	50978714	Treacher Collins-Franceschetti syndrome 1	0.393775		720	345776465	ubiquitin carboxyl-terminal hydrolase 15 isoform 10	0.215628		720	73996743	twinfilin-1 isoform 1	0.483583
721	57098795	golgi phosphoprotein 3-like	0.39305		721	345791211	uncharacterized protein KIAA1671	0.212723		721	345782253	mitogen-activated protein kinase kinase kinase kinase 3 isoform 1	0.482397
722	73987401	polypyrimidine tract-binding protein 1 isoform 8	0.39305		722	345781882	rho-associated protein kinase 2	0.211928		722	73977245	receptor-type tyrosine-protein phosphatase F isoform 3	0.477862
723	345791621	prohibitin-2	0.392393		723	73953838	protein FAM190B	0.210961		723	73951060	lysM and putative peptidoglycan-binding domain-containing protein 4 isoform 1	0.477718
724	73958451	serine/threonine-protein kinase TAO2 isoform 2	0.388185		724	74004835	lupus La protein homolog	0.210358		724	73959035	heme oxygenase 2 isoform 2	0.477289
725	73959841	ras-related protein Rab-40C	0.387832		725	345785094	signal-induced proliferation-associated 1 like 3	0.210014		725	74005159	STE20-related kinase adapter protein beta isoform 1	0.468266
726	73984745	myotubularin-related protein 14 isoform 8	0.387666		726	345800927	WW domain containing E3 ubiquitin protein ligase 2 isoform 2	0.208134		726	345790530	E3 ubiquitin-protein ligase SH3RF1 isoform 3	0.464877
727	345776566	phosphatidylinositol-5-phosphate 4-kinase type-2 gamma	0.386115		727	359318632	relA-associated inhibitor	0.207442		727	345779600	ubiquitin carboxyl-terminal hydrolase 46 isoform 2	0.462473
728	345798833	cancer-related nucleoside-triphosphatase isoform 1	0.38443		728	345803552	pleckstrin homology domain-containing family G member 3 isoform 2	0.206995		728	345794202	aspartate aminotransferase, mitochondrial	0.456808
729	73987830	teneurin-4 isoform 4	0.383926		729	74008079	long-chain-fatty-acid--CoA ligase 4 isoform 4	0.206868		729	345790427	cathepsin B	0.455275
730	345799212	disks large homolog 5	0.38144		730	73993907	GTPase SLIP-GC	0.202909		730	345803051	desmocollin-3	0.454287
731	74000783	testis-expressed sequence 9 protein	0.379335		731	359320707	probable ATP-dependent RNA helicase YTHDC2	0.202849		731	73975685	neural Wiskott-Aldrich syndrome protein isoform 1	0.454049
732	359323402	zinc finger FYVE domain-containing protein 19-like	0.377804		732	345801630	dual specificity protein phosphatase CDC14A isoform 2	0.202229		732	57098795	golgi phosphoprotein 3-like	0.450285
733	73946098	syntaxin-11	0.377802		733	345792128	protein MICAL-3	0.19964		733	359323305	tumor protein D52	0.450194
734	345795753	protein FAM190A	0.376244		734	345803467	rho-associated protein kinase 1	0.19956		734	74008079	long-chain-fatty-acid--CoA ligase 4 isoform 4	0.450105
735	73969822	sprouty-related, EVH1 domain-containing protein 2 isoform 1	0.375115		735	345779267	protein FAM83H	0.199319		735	345798207	stromal interaction molecule 2	0.446303
736	356460984	eukaryotic peptide chain release factor subunit 1	0.373785		736	345790800	arf-GAP with GTPase, ANK repeat and PH domain-containing protein 1	0.198377		736	57088217	rho GTPase-activating protein 29 isoform 1	0.444889
737	73992699	solute carrier organic anion transporter family member 4A1	0.371399		737	345791022	AP-1 complex subunit beta-1 isoform 1	0.195298		737	345804978	serine/threonine-protein kinase TAO1	0.4435
738	354623039	eukaryotic initiation factor 4A-I	0.371264		738	73962317	thyroid receptor-interacting protein 11	0.194691		738	73978695	ATP-binding cassette sub-family F member 2 isoform 2	0.443417
739	345801038	TLD domain-containing protein KIAA1609	0.371264		739	73946726	selenocysteine insertion sequence-binding protein 2 isoform 1	0.193293		739	50979162	signal peptidase complex subunit 2	0.441152
740	345782310	transmembrane protein 87B	0.368278		740	74007037	melanoma-associated antigen D2 isoform 2	0.19066		740	73975675	exocyst complex component 4	0.439914
741	73975991	hyccin isoform 1	0.365639		741	50979066	signal recognition particle 72 kDa protein	0.190193		741	345788602	FERM, RhoGEF and pleckstrin domain-containing protein 1	0.43762
742	345790755	vinexin	0.364872		742	345783052	spectrin beta chain, brain 2 isoform 1	0.187539		742	73987276	casein kinase I isoform gamma-2 isoform 1	0.433196
743	73986746	ATP-dependent RNA helicase DDX39A	0.364731		743	73951271	elongation factor Tu GTP-binding domain-containing protein 1 isoform 5	0.186409		743	57043483	transcription initiation factor TFIID subunit 7	0.43317
744	345798362	actin filament-associated protein 1 isoform 1	0.364259		744	306482574	disintegrin and metalloproteinase domain-containing protein 9 precursor	0.183925		744	359323572	splicing factor U2AF 35 kDa subunit isoform 1	0.432076
745	73975460	multiple myeloma tumor-associated protein 2	0.363693		745	345796694	desmoplakin	0.183354		745	345788679	protein sprouty homolog 2	0.431357
746	345790202	probable phospholipid-transporting ATPase IIA	0.36294		746	345781595	tyrosine-protein kinase SgK223-like	0.176215		746	345801761	tubulin polyglutamylase TTLL7 isoform 3	0.431227
747	73953348	UPF0498 protein KIAA1191 isoform 1	0.36219		747	345776764	G2 and S phase-expressed protein 1	0.175784		747	73991183	protein jagged-1 isoform 1	0.429194
748	57089603	SHC-transforming protein 1 isoform 1	0.358843		748	345784805	rho GTPase-activating protein 18	0.175528		748	359320043	sorting nexin-6	0.427413
749	345799184	oncostatin-M-specific receptor subunit beta	0.358732		749	73958451	serine/threonine-protein kinase TAO2 isoform 2	0.174435		749	73977664	phosphate carrier protein, mitochondrial isoform 1	0.425502
750	345777442	RUN and FYVE domain-containing protein 1 isoform 2	0.35792		750	359324173	ubiquitin-like modifier activating enzyme 1	0.173673		750	160425231	myosin-9	0.420126
751	74005696	BRCA1-associated RING domain protein 1	0.356709		751	73993594	serine/threonine-protein kinase Nek1 isoform 1	0.171194		751	73962756	proteasome subunit alpha type-6 isoform 2	0.418741
752	73997538	ELKS/Rab6-interacting/CAST family member 1 isoform 8	0.355073		752	50978650	rho GTPase-activating protein 35	0.169526		752	169790794	cation-independent mannose-6-phosphate receptor precursor	0.416855
753	74005583	long-chain-fatty-acid--CoA ligase 3 isoform 2	0.353536		753	345799863	pleckstrin homology-like domain, family B, member 1 isoform 2	0.166194		753	73960378	tyrosine-protein phosphatase non-receptor type 14 isoform 1	0.416696
754	345783274	guanine nucleotide exchange factor for Rab-3A	0.352008		754	345800748	rho guanine nucleotide exchange factor 16	0.165317		754	345778076	catenin alpha-1 isoform 4	0.414545
755	345786212	LIM and cysteine-rich domains protein 1	0.351358		755	359321557	disintegrin and metalloproteinase domain-containing protein 17	0.163175		755	73948571	pleckstrin homology domain-containing family F member 1	0.412278
756	345788793	integral membrane protein 2B	0.350191		756	73966339	neurabin-2 isoform 1	0.159509		756	73965482	glycylpeptide N-tetradecanoyltransferase 1 isoform 1	0.410404
757	345796880	leucine-rich repeat-containing protein 16A isoform 1	0.346492		757	73957772	huntingtin-interacting protein 1	0.159498		757	74000130	dnaJ homolog subfamily C member 17	0.406224
758	345793425	rho GTPase-activating protein 21	0.344889		758	73950854	ephrin type-A receptor 2 isoform 1	0.158701		758	50950181	hepatocyte growth factor receptor precursor	0.405685
759	345807429	immunoglobulin-binding protein 1 isoform 1	0.344746		759	345792261	caprin-2 isoform 1	0.157011		759	73955966	cytospin-B isoform 2	0.405603
760	73955990	epsin-2 isoform 1	0.343726		760	359320808	DENN domain-containing protein 4C-like	0.155288		760	57109456	syntaxin-19	0.403757
761	345777949	GRAM domain-containing protein 3 isoform 2	0.343519		761	359321252	rap guanine nucleotide exchange factor 2-like	0.153337		761	345784702	probable palmitoyltransferase ZDHHC14	0.401907
762	73949024	pre-mRNA-splicing factor 18 isoform 1	0.338931		762	359318597	AP-2 complex subunit alpha-1 isoform 1	0.152191		762	345799182	rapamycin-insensitive companion of mTOR	0.401813
763	345792128	protein MICAL-3	0.337497		763	345805996	spectrin alpha chain, brain	0.151167		763	345779000	myosin-VI isoform 8	0.400423
764	73977460	protein phosphatase 1 regulatory subunit 12A isoform 9	0.335739		764	73996670	disco-interacting protein 2 homolog B	0.151105		764	73976815	microtubule-actin cross-linking factor 1 isoform 2	0.398125
765	345781604	PH and SEC7 domain-containing protein 3	0.333041		765	73982653	cysteinyl-tRNA synthetase, cytoplasmic isoform 2	0.14672		765	50979166	endoplasmin precursor	0.39745
766	73965482	glycylpeptide N-tetradecanoyltransferase 1 isoform 1	0.331714		766	359319102	kazrin	0.14218		766	345793425	rho GTPase-activating protein 21	0.391828
767	73969383	eukaryotic translation initiation factor 5B isoform 2	0.331546		767	345777442	RUN and FYVE domain-containing protein 1 isoform 2	0.139469		767	74007037	melanoma-associated antigen D2 isoform 2	0.391145
768	345785044	rRNA 2'-O-methyltransferase fibrillarin	0.330755		768	73963357	alpha-actinin-1 isoform 10	0.136684		768	73999483	transient receptor potential cation channel subfamily A member 1	0.385465
769	345795869	la-related protein 7	0.328305		769	345788719	dedicator of cytokinesis protein 9	0.134839		769	73987830	teneurin-4 isoform 4	0.384943
770	345806752	uncharacterized protein LOC609832	0.328278		770	345799174	caspase recruitment domain-containing protein 6	0.133688		770	73970013	cytoplasmic protein NCK2	0.384261
771	345785094	signal-induced proliferation-associated 1 like 3	0.326502		771	345805768	myosin-Id	0.128146		771	73969383	eukaryotic translation initiation factor 5B isoform 2	0.382399
772	359320368	polymerase I and transcript release factor-like	0.326111		772	345803790	ATP-dependent RNA helicase DDX24	0.12638		772	50979054	vasodilator-stimulated phosphoprotein	0.380726
773	73964695	fatty acid synthase	0.320712		773	73994204	leucine-rich repeat flightless-interacting protein 2	0.125993		773	345802949	heterogeneous nuclear ribonucleoprotein U isoform 1	0.378342
774	74000130	dnaJ homolog subfamily C member 17	0.319891		774	359323791	eukaryotic translation initiation factor 4 gamma 1	0.123864		774	359318871	kinesin-1 heavy chain-like	0.376779
775	345799998	rho GTPase-activating protein 32	0.319598		775	359323995	protein dispatched homolog 1	0.120163		775	345776566	phosphatidylinositol-5-phosphate 4-kinase type-2 gamma	0.37274
776	73983948	ankyrin repeat domain-containing protein 50 isoform 1	0.319416		776	345801761	tubulin polyglutamylase TTLL7 isoform 3	0.115537		776	345778214	ras-related GTP-binding protein D	0.372725
777	359318523	suppressor of cytokine signaling 6-like	0.316488		777	345799182	rapamycin-insensitive companion of mTOR	0.114996		777	345779559	protein scribble homolog, partial	0.370742
778	73970756	protein transport protein Sec24A isoform 2	0.313405		778	345790055	DNA topoisomerase 1	0.107643		778	73989720	1-phosphatidylinositol-4,5-bisphosphate phosphodiesterase delta-1 isoform 3	0.3704
779	73946726	selenocysteine insertion sequence-binding protein 2 isoform 1	0.312478		779	359320309	myosin-Ic-like isoform 2	0.105052		779	359322593	TBC1 domain family member 5 isoform 1	0.370366
780	73973246	protein FAM135A isoform 9	0.310816		780	345791952	aryl hydrocarbon receptor nuclear translocator-like 2	0.102821		780	345781415	5'-AMP-activated protein kinase subunit gamma-2	0.369532
781	345797685	vang-like protein 2	0.309718		781	345787186	dedicator of cytokinesis protein 6	0.0973543		781	73987385	UBX domain-containing protein 6	0.369167
782	73993907	GTPase SLIP-GC	0.309387		782	73966629	clathrin heavy chain 1 isoform 1	0.0955125		782	345789233	cytoplasmic protein NCK1 isoform 3	0.36893
783	359323712	UAP56-interacting factor-like	0.308627		783	73973141	dystonin isoform 15	0.0939565		783	73954361	myotubularin-related protein 12	0.362551
784	74007807	phosphoglycerate kinase 1 isoform 2	0.307416		784	345788666	probable E3 ubiquitin-protein ligase MYCBP2 isoform 2	0.0826662		784	73965213	probable ATP-dependent RNA helicase DDX5 isoform 2	0.362294
785	345778962	heterogeneous nuclear ribonucleoprotein C-like 1	0.305401		785	345782111	CAD protein	0.0802684		785	73969119	casein kinase I isoform epsilon isoform 3	0.361835
786	345784000	oxysterol-binding protein-related protein 5	0.303813		786	345800412	dedicator of cytokinesis protein 7 isoform 1	0.0681154		786	73987266	AP-3 complex subunit delta-1 isoform 3	0.36052
787	345806577	tensin-3, partial	0.301203		787	359320150	protein Daple	0.0499375		787	73986746	ATP-dependent RNA helicase DDX39A	0.356728
788	345804890	E3 ubiquitin-protein ligase SMURF2	0.295482							788	73951749	SH3 domain and tetratricopeptide repeats-containing protein 1	0.351421
789	359319282	SH3 and PX domain-containing protein 2B, partial	0.294846		Rank	Accession	Ribosomal proteins identified with Occludin-BL	a-N-PSM/OPN		789	345804687	casein kinase I isoform delta	0.348961
790	73974563	DEP domain-containing mTOR-interacting protein	0.294128		1	345780890	40S ribosomal protein S8	5.818		790	74008829	filamin-A isoform 1	0.346702
791	73992315	aurora kinase A isoform 1	0.291987		2	345804327	60S ribosomal protein L36a isoform 1	5.5372		791	73974722	plectin isoform 7	0.346333
792	73970139	epithelial cell adhesion molecule	0.288323		3	73983790	4F2 cell-surface antigen heavy chain	5.11948		792	345787803	switch-associated protein 70 isoform 1	0.346163
793	345795159	neogenin isoform 2	0.286907		4	356640165	40S ribosomal protein S24 isoform 1	2.75071		793	73954674	probable ATP-dependent RNA helicase DDX6 isoform 2	0.345055
794	74001606	disco-interacting protein 2 homolog A	0.284373		5	73953669	40S ribosomal protein S14 isoform 3	2.62256		794	73983543	nucleosome assembly protein 1-like 4	0.344345
795	73991183	protein jagged-1 isoform 1	0.283174		6	57111003	60S ribosomal protein L37a	2.43341		795	345792128	protein MICAL-3	0.339006
796	345785040	uncharacterized protein C19orf47 homolog isoform 2	0.280032		7	356460989	ribosomal protein S15a	2.21059		796	73970756	protein transport protein Sec24A isoform 2	0.334722
797	359323089	tensin-like C1 domain-containing phosphatase	0.277781		8	354459064	60S ribosomal protein L18	2.02229		797	73965247	importin subunit alpha-2 isoform 2	0.334167
798	345796694	desmoplakin	0.275786		9	57084757	40S ribosomal protein S23 isoform 1	1.95424		798	59958375	utrophin	0.3321
799	345802027	elongation factor Tu, mitochondrial	0.274765		10	354542533	60S ribosomal protein L12	1.77574		799	73996670	disco-interacting protein 2 homolog B	0.330359
800	345779592	SLAIN motif-containing protein 2	0.273785		11	345785728	40S ribosomal protein S16	1.76435		800	73969934	beta-adducin isoform 1	0.330102
801	50979014	calnexin precursor	0.272371		12	356460868	60S ribosomal protein L32	1.689		801	282848164	mothers against decapentaplegic homolog 3	0.32771
802	359322869	vigilin isoform 3	0.271402		13	345795037	ribosomal protein S27-like	1.66636		802	73977882	LPS-responsive vesicle trafficking, beach and anchor containing isoform 1	0.326818
803	345803210	ras GTPase-activating protein nGAP	0.268879		14	356991204	60S ribosomal protein L26	1.66486		803	345790743	ectonucleoside triphosphate diphosphohydrolase 4	0.325536
804	345798988	vinculin	0.267362		15	345800704	60S ribosomal protein L13	1.62523		804	345800748	rho guanine nucleotide exchange factor 16	0.325133
805	359318632	relA-associated inhibitor	0.26618		16	345799858	40S ribosomal protein S25	1.59284		805	359321356	UMP-CMP kinase isoform 2	0.319981
806	73995870	protein HIRA isoform 3	0.264843		17	240266716	ribosomal protein S5 [Microsporum canis]	1.58643		806	345783183	1-phosphatidylinositol-4,5-bisphosphate phosphodiesterase beta-3	0.318218
807	73958861	pyridoxal-dependent decarboxylase domain-containing protein 1 isoform 1	0.264843		18	345800307	60S ribosomal protein L23a-like	1.45114		807	345804252	sec1 family domain-containing protein 1 isoform 1	0.317764
808	345796179	poliovirus receptor-related protein 3	0.262306		19	57092109	60S ribosomal protein L35	1.37461		808	345777166	LIM and senescent cell antigen-like domains 3-like	0.316923
809	359323995	protein dispatched homolog 1	0.261642		20	345789293	5'-3' exoribonuclease 1 isoform 2	1.32094		809	73945631	G-protein coupled receptor 126 isoform 3	0.315303
810	73998572	leucine-rich repeat protein SHOC-2 isoform 1	0.25932		21	356460872	40S ribosomal protein S6	1.31549		810	345799195	ankycorbin	0.314384
811	73950535	sodium/hydrogen exchanger 1	0.257794		22	345801679	60S ribosomal protein L5 isoform 1	1.26441		811	73948384	NAD-dependent deacetylase sirtuin-2	0.310092
812	345781064	FYVE, RhoGEF and PH domain-containing protein 6	0.257414		23	57109436	60S ribosomal protein L24 isoform 2	1.25386		812	345803465	receptor-type tyrosine-protein phosphatase mu isoform 1	0.306907
813	345776780	polymerase delta-interacting protein 3 isoform 1	0.256287		24	74007766	60S ribosomal protein L31-like isoform 1	1.22709		813	73950627	elongation factor 1-alpha-like	0.301571
814	73972878	inactive tyrosine-protein kinase 7 isoform 1	0.255098		25	57092007	60S ribosomal protein L7a	1.21979		814	345790435	uncharacterized protein C8orf42	0.297279
815	345778691	serine/threonine-protein kinase 38	0.252594		26	345805448	60S ribosomal protein L19 isoform 4	1.16065		815	345786850	twinfilin-2	0.296542
816	345799182	rapamycin-insensitive companion of mTOR	0.252352		27	345789107	60S ribosomal protein L15 isoform 4	1.149		816	73975023	exocyst complex component 1 isoform 1	0.290085
817	345786673	heterogeneous nuclear ribonucleoprotein M isoform 2	0.24974		28	57092393	40S ribosomal protein S26 isoform 1	1.11066		817	345782950	epidermal growth factor receptor	0.289473
818	359319134	zinc finger FYVE domain-containing protein 16	0.248721		29	73974792	60S ribosomal protein L8 isoform 3	1.1091		818	345805223	canalicular multispecific organic anion transporter 2	0.286451
819	74003324	AP-2 complex subunit mu isoform 21	0.247599		30	354725920	60S ribosomal protein L21	1.05208		819	73958652	uncharacterized protein LOC479802 isoform 1	0.282855
820	73953838	protein FAM190B	0.247102		31	73994633	60S ribosomal protein L6 isoform 1	1.00636		820	345777687	tyrosine-protein phosphatase non-receptor type 3 isoform 2	0.282062
821	73945568	uncharacterized protein LOC476211 isoform 1	0.24176		32	189339186	40S ribosomal protein S18	0.993041		821	345801612	chloride channel CLIC-like 1 isoform 1	0.281679
822	345779909	coatomer subunit gamma-2	0.241207		33	57098089	40S ribosomal protein S7 isoform 1	0.991884		822	359320591	T-complex protein 1 subunit delta-like	0.280911
823	74007632	non-POU domain-containing octamer-binding protein isoform 2	0.240797		34	354622964	60S ribosomal protein L27	0.90855		823	73963357	alpha-actinin-1 isoform 10	0.279949
824	345788242	harmonin isoform 4	0.238504		35	356582337	60S ribosomal protein L7	0.902364		824	345783274	guanine nucleotide exchange factor for Rab-3A	0.272434
825	50978812	transferrin receptor protein 1	0.236871		36	57102362	40S ribosomal protein S3 isoform 1	0.899493		825	345805946	protein GPR107 isoform 2	0.271344
826	345801630	dual specificity protein phosphatase CDC14A isoform 2	0.234293		37	345787852	40S ribosomal protein S13	0.852513		826	345798972	vacuolar protein sorting-associated protein 26A isoform 1	0.271344
827	73983952	Bardet-Biedl syndrome 7 protein isoform 1	0.233161		38	356991221	60S ribosomal protein L14	0.812525		827	356991236	hsc70-interacting protein	0.270263
828	345802726	ATP synthase subunit alpha, mitochondrial isoform 2	0.231267		39	73977903	40S ribosomal protein S3a isoform 1	0.722926		828	73948884	phosphatidylinositol-5-phosphate 4-kinase type-2 alpha	0.268671
829	345794865	protein disulfide-isomerase A3	0.231267		40	354721202	40S ribosomal protein S10	0.704797		829	345794106	cAMP-specific 3',5'-cyclic phosphodiesterase 4D isoform 2	0.268485
830	345787186	dedicator of cytokinesis protein 6	0.231225		41	50978924	ribosome-binding protein 1	0.667881		830	345780137	calcium-binding mitochondrial carrier protein Aralar2	0.267084
831	345777259	metal transporter CNNM4	0.230053		42	356460949	ribosomal protein, large, P0	0.664492		831	307938295	guanine nucleotide-binding protein subunit alpha-11	0.267071
832	345790800	arf-GAP with GTPase, ANK repeat and PH domain-containing protein 1	0.22983		43	345776672	60S ribosomal protein L17-like	0.632597		832	345790868	BRCA1-associated protein	0.267057
833	73966759	TATA-binding protein-associated factor 2N isoform 1	0.229451		44	356582349	ribosomal protein SA	0.599614		833	345787549	SURP and G-patch domain-containing protein 1 isoform 3	0.26705
834	345802232	ERI1 exoribonuclease 2	0.229147		45	345796306	60S ribosomal protein L27a-like	0.551776		834	345791169	rasGAP-activating-like protein 1	0.266023
835	308210803	xenotropic and polytropic retrovirus receptor 1	0.227663		46	345794445	ribosomal protein S6 kinase alpha-1	0.521163		835	74004771	integrin alpha-V isoform 2	0.264984
836	345780137	calcium-binding mitochondrial carrier protein Aralar2	0.227073		47	73946777	40S ribosomal protein S5 isoform 5	0.517505		836	345787491	microtubule-associated protein 4 isoform 1	0.261958
837	345784458	connector enhancer of kinase suppressor of ras 3	0.226486		48	345786873	60S ribosomal protein L29	0.51431		837	345804993	carboxypeptidase D isoform 1	0.258916
838	73954361	myotubularin-related protein 12	0.225229		49	359806968	60S ribosomal protein L11 isoform 2	0.508038		838	74009203	H/ACA ribonucleoprotein complex subunit 4	0.257736
839	345802949	heterogeneous nuclear ribonucleoprotein U isoform 1	0.224926		50	354725914	40S ribosomal protein S4, X isoform	0.496494		839	74002388	2-hydroxyacylsphingosine 1-beta-galactosyltransferase	0.236362
840	345790530	E3 ubiquitin-protein ligase SH3RF1 isoform 3	0.223446		51	356461025	60S ribosomal protein L3	0.4882		840	359323807	phospholipase D1 isoform 1	0.234087
841	345787655	epidermal growth factor receptor pathway substrate 15-like 1 isoform 2	0.223446		52	57112881	60S ribosomal protein L10 isoform 1	0.478084		841	345806577	tensin-3, partial	0.233113
842	359318559	EPS8-like 1	0.22293		53	73947970	40S ribosomal protein S11 isoform 3	0.417146		842	73965766	signal transducer and activator of transcription 3 isoform 1	0.232719
843	359322590	peptide-N(4)-(N-acetyl-beta-glucosaminyl)asparagine amidase	0.221444		54	57101324	60S ribosomal protein L18a isoform 1	0.380311		843	359321663	SH3 domain-containing YSC84-like protein 1-like	0.231283
844	73996670	disco-interacting protein 2 homolog B	0.22106		55	356991214	60S ribosomal protein L4	0.361449		844	359322142	elongation factor 2	0.231128
845	345804357	E3 ubiquitin-protein ligase TRIM9	0.220781		56	73947567	40S ribosomal protein S9	0.345156		845	73949024	pre-mRNA-splicing factor 18 isoform 1	0.229796
846	345798392	probable histone-lysine N-methyltransferase NSD2	0.218235		57	73962610	40S ribosomal protein S2-like isoform 2	0.300407		846	73979871	trifunctional enzyme subunit beta, mitochondrial isoform 1	0.228404
847	345800748	rho guanine nucleotide exchange factor 16	0.216442		58	73959105	ribosomal L1 domain-containing protein 1	0.25732		847	345786285	plexin-A1	0.22314
848	345807420	hephaestin	0.215557							848	359321459	protein disulfide-isomerase A4 isoform 3	0.220759
849	345777328	reticulon-4 isoform 1	0.215557							849	57089883	ralA-binding protein 1	0.220287
850	73995170	vacuolar protein sorting-associated protein 33A	0.212743							850	50978988	receptor tyrosine-protein kinase erbB-2 precursor	0.220202
851	73966275	insulin-like growth factor 2 mRNA binding protein 1 isoform 2	0.211205							851	345797242	integrin beta-6 isoform 3	0.219477
852	359322257	ran-binding protein 3 isoform 1	0.209142							852	345785726	mitochondrial import inner membrane translocase subunit TIM50	0.214671
853	359320545	diacylglycerol kinase alpha-like	0.206722							853	359319190	iduronidase, alpha-L-	0.213192
854	73985178	filamin-B isoform 8	0.203996							854	73957545	cytoplasmic dynein 1 light intermediate chain 2	0.211995
855	73983713	protein fat-free homolog	0.203837							855	345777328	reticulon-4 isoform 1	0.210827
856	359323544	protein SON-like isoform 2	0.203738							856	345787199	AP-1 complex subunit mu-2	0.20937
857	359320981	heat shock protein HSP 90-beta isoform 1	0.203097							857	359321496	zinc finger CCCH-type antiviral protein 1-like	0.209123
858	359323807	phospholipase D1 isoform 1	0.202894							858	345785258	uncharacterized protein LOC484161	0.206139
859	73990034	calpain-7 isoform 3	0.202317							859	73949411	protocadherin gamma-C5 isoform 4	0.206136
860	73974722	plectin isoform 7	0.201294							860	345788719	dedicator of cytokinesis protein 9	0.205714
861	345783091	phosphofurin acidic cluster sorting protein 1	0.201102							861	345790248	thrombospondin type-1 domain-containing protein 1 isoform 1	0.205124
862	345779909	coatomer subunit gamma-2	0.200572							862	345802120	calcium-binding mitochondrial carrier protein SCaMC-1	0.200698
863	345792623	uncharacterized protein C10orf12	0.199431							863	50978730	frizzled-6 precursor	0.200394
864	73996688	LIM domain and actin-binding protein 1	0.198903							864	345788378	stromal interaction molecule 1	0.200106
865	359322593	TBC1 domain family member 5 isoform 1	0.198303							865	73960652	protein-associating with the carboxyl-terminal domain of ezrin isoform 1	0.198932
866	345800040	signal recognition particle receptor subunit alpha-like	0.196967							866	73967054	myosin-XVIIIa isoform 3	0.196931
867	345791022	AP-1 complex subunit beta-1 isoform 1	0.196085							867	73949721	ATP-dependent RNA helicase DHX29	0.195026
868	73991667	E3 ubiquitin-protein ligase Itchy homolog isoform 2	0.195561							868	74006567	SH3 domain-containing kinase-binding protein 1 isoform 2	0.18334
869	345778590	sine oculis-binding protein homolog	0.193488							869	345792597	delta-1-pyrroline-5-carboxylate synthase isoform 1	0.18138
870	73963296	MAGUK p55 subfamily member 5 isoform 1	0.193062							870	345792829	actin-binding LIM protein 1	0.179586
871	57089883	ralA-binding protein 1	0.187287							871	73997538	ELKS/Rab6-interacting/CAST family member 1 isoform 8	0.177314
872	73999449	deubiquitinating protein VCIP135	0.187138							872	73995870	protein HIRA isoform 3	0.170442
873	345800927	WW domain containing E3 ubiquitin protein ligase 2 isoform 2	0.185276							873	345796461	coiled-coil domain-containing protein 50	0.170074
874	57088635	inactive rhomboid protein 1 isoform 1	0.184527							874	189339282	multidrug resistance-associated protein 5	0.170015
875	73978854	poly [ADP-ribose] polymerase 12	0.183753							875	359323995	protein dispatched homolog 1	0.166127
876	73980101	spastin isoform 2	0.182225							876	345799031	glutamate dehydrogenase 1, mitochondrial	0.165051
877	73984948	coatomer subunit gamma	0.181847							877	345795753	protein FAM190A	0.161236
878	345788408	rho GTPase-activating protein 42	0.181737							878	345798045	semaphorin-4B	0.159239
879	74005006	signal transducer and activator of transcription 1 isoform 2	0.18147							879	345798556	calpastatin isoform 3	0.15493
880	73995370	beta-adrenergic receptor kinase 2	0.181095							880	73994204	leucine-rich repeat flightless-interacting protein 2	0.149861
881	160837818	microtubule-associated protein tau	0.180722							881	50978650	rho GTPase-activating protein 35	0.142084
882	73959409	syntaxin-binding protein 3 isoform 1	0.18035							882	345783091	phosphofurin acidic cluster sorting protein 1	0.141325
883	345800504	myb-binding protein 1A isoform 4	0.179798							883	345801919	periplakin	0.139429
884	359319865	plakophilin-1-like	0.178878							884	359323602	A disintegrin and metalloproteinase with thrombospondin motifs 1, partial	0.132751
885	345787549	SURP and G-patch domain-containing protein 1 isoform 3	0.176358							885	345806311	protein AHNAK2	0.132187
886	345792261	caprin-2 isoform 1	0.173613							886	57093919	chondroitin sulfate synthase 3	0.118594
887	345804402	kinectin	0.172681							887	345788408	rho GTPase-activating protein 42	0.116959
888	345786673	heterogeneous nuclear ribonucleoprotein M isoform 2	0.171759							888	345788878	golgin subfamily A member 4	0.116585
889	359319102	kazrin	0.171673							889	74005696	BRCA1-associated RING domain protein 1	0.114588
890	345785604	semaphorin-4D	0.171192							890	345799998	rho GTPase-activating protein 32	0.102596
891	73950269	heterochromatin protein 1-binding protein 3 isoform 2	0.169865							891	359320585	spectrin beta chain, brain 1	0.100876
892	345804928	protein TANC2 isoform 2	0.169209							892	345800417	inaD-like protein isoform 3	0.0837481
893	345803047	desmoglein-2	0.168434							893	345777987	rap guanine nucleotide exchange factor 6 isoform 4	0.0795264
894	359320808	DENN domain-containing protein 4C-like	0.16569							894	345794813	pseudopodium-enriched atypical kinase 1	0.0793738
895	73976559	nucleotide-binding oligomerization domain-containing protein 1	0.162918							895	359321252	rap guanine nucleotide exchange factor 2-like	0.0778829
896	345789024	1-phosphatidylinositol-4,5-bisphosphate phosphodiesterase eta-1	0.161865							896	73974204	E3 ubiquitin-protein ligase UBR5 isoform 1	0.0672562
897	74001687	BMP-2-inducible protein kinase isoform 1	0.159364							897	74000347	vacuolar protein sorting-associated protein 13C isoform 5	0.0644522
898	359321587	trifunctional enzyme subunit alpha, mitochondrial-like	0.158786							898	359322869	vigilin isoform 3	0.0635764
899	345778448	uncharacterized protein LOC100684170	0.158786							899	345786999	kinesin family member 15	0.0553763
900	359323202	phosphatidylinositide phosphatase SAC2-like	0.157324							900	74001821	tyrosine-protein phosphatase non-receptor type 13 isoform 4	0.0517437
901	345792487	VPS10 domain-containing receptor SorCS3	0.155468							901	345792434	myoferlin isoform 5	0.0501375
902	57095096	lebercilin	0.154104							902	345796694	desmoplakin	0.0374652
903	345801715	serine/threonine-protein kinase N2	0.153772
904	345791211	uncharacterized protein KIAA1671	0.151196							Rank	Accession	Ribosomal proteins identified with BL-Claudin-4	a-N-PSM/OPN
905	345780106	sterile alpha motif domain containing 9-like	0.151121							1	359318950	60S ribosomal protein L23a-like	10.3627
906	345799174	caspase recruitment domain-containing protein 6	0.147824							2	57109436	60S ribosomal protein L24 isoform 2	9.33217
907	73960532	Abelson tyrosine-protein kinase 2 isoform 1	0.145357							3	356991204	60S ribosomal protein L26	5.87928
908	345788572	sciellin	0.144938							4	345780890	40S ribosomal protein S8	5.72519
909	73957772	huntingtin-interacting protein 1	0.14225							5	345804327	60S ribosomal protein L36a isoform 1	4.85794
910	359323265	erythroid differentiation-related factor 1-like isoform 2	0.141108							6	354459064	60S ribosomal protein L18	3.34507
911	345805692	ubiquitin carboxyl-terminal hydrolase 32 isoform 1	0.139291							7	57089821	60S ribosomal protein L17 isoform 1	3.00781
912	345792540	WD repeat-containing protein 11	0.136314							8	345786873	60S ribosomal protein L29	2.30534
913	345801761	tubulin polyglutamylase TTLL7 isoform 3	0.135765							9	57092109	60S ribosomal protein L35	2.2113
914	73973859	inhibitor of Bruton tyrosine kinase	0.130455							10	345796306	60S ribosomal protein L27a-like	2.16824
915	73949494	transcription elongation regulator 1 isoform 8	0.125635							11	50978792	60S ribosomal protein L23	2.05385
916	345792481	SH3 and PX domain-containing protein 2A	0.125187							12	356640165	40S ribosomal protein S24 isoform 1	1.90116
917	74007169	cyclin-dependent kinase-like 5	0.125036							13	57084757	40S ribosomal protein S23 isoform 1	1.84127
918	345793175	leucine-rich repeat and coiled-coil domain-containing protein 1	0.124595							14	356460872	40S ribosomal protein S6	1.79515
919	345798721	inositol hexakisphosphate and diphosphoinositol-pentakisphosphate kinase 2	0.122282							15	354725920	60S ribosomal protein L21	1.72784
920	359319712	ubiquitin carboxyl-terminal hydrolase 31-like	0.118302							16	73994633	60S ribosomal protein L6 isoform 1	1.66189
921	345792510	kinesin family member 11	0.115633							17	57111003	60S ribosomal protein L37a	1.6346
922	73951083	insulin-like growth factor 1 receptor isoform 1	0.114277							18	345805448	60S ribosomal protein L19 isoform 4	1.55318
923	345783125	EH domain binding protein 1-like 1 isoform 1	0.114128							19	345800704	60S ribosomal protein L13	1.43231
924	345779267	protein FAM83H	0.112085							20	50978924	ribosome-binding protein 1	1.42602
925	345791952	aryl hydrocarbon receptor nuclear translocator-like 2	0.111941							21	57092007	60S ribosomal protein L7a	1.41423
926	345788602	FERM, RhoGEF and pleckstrin domain-containing protein 1	0.110838							22	73974792	60S ribosomal protein L8 isoform 3	1.36217
927	359319800	uncharacterized protein LOC609646	0.109018							23	73947567	40S ribosomal protein S9	1.31077
928	73958652	uncharacterized protein LOC479802 isoform 1	0.108815							24	73953669	40S ribosomal protein S14 isoform 3	1.28952
929	345798262	A-kinase anchor protein 13	0.104582							25	73959105	ribosomal L1 domain-containing protein 1	1.26062
930	359320707	probable ATP-dependent RNA helicase YTHDC2	0.104582							26	359806968	60S ribosomal protein L11 isoform 2	1.2409
931	345804262	HEAT repeat-containing protein 5A isoform 2	0.10335							27	57102362	40S ribosomal protein S3 isoform 1	1.23834
932	345782941	protein cordon-bleu	0.101919							28	356582349	ribosomal protein SA	1.20853
933	73987867	remodeling and spacing factor 1 isoform 1	0.101451							29	354725914	40S ribosomal protein S4, X isoform	1.18389
934	359321252	rap guanine nucleotide exchange factor 2-like	0.100632							30	345799858	40S ribosomal protein S25	1.08709
935	359319181	limbin	0.0991517							31	354542533	60S ribosomal protein L12	1.07676
936	73993293	neurobeachin isoform 2	0.0987051							32	356991214	60S ribosomal protein L4	1.03189
937	345799863	pleckstrin homology-like domain, family B, member 1 isoform 2	0.0982981							33	57092393	40S ribosomal protein S26 isoform 1	0.999879
938	73973141	dystonin isoform 15	0.0956525							34	356991221	60S ribosomal protein L14	0.977306
939	345801936	structure-specific endonuclease subunit SLX4	0.0954777							35	57098089	40S ribosomal protein S7 isoform 1	0.963777
940	73951551	IQ motif containing GTPase activating protein 1	0.0931745							36	73947970	40S ribosomal protein S11 isoform 3	0.934703
941	73949721	ATP-dependent RNA helicase DHX29	0.0862698							37	345785728	40S ribosomal protein S16	0.914463
942	57104270	brefeldin A-inhibited guanine nucleotide-exchange protein 2	0.0826108							38	356582337	60S ribosomal protein L7	0.904604
943	345788661	LIM domain only protein 7	0.0824554							39	345789107	60S ribosomal protein L15 isoform 4	0.859546
944	73960265	neuron navigator 1 isoform 2	0.0732248							40	356460949	ribosomal protein, large, P0	0.7823
945	73998665	eukaryotic translation initiation factor 3 subunit A isoform 2	0.0697139							41	356461025	60S ribosomal protein L3	0.773084
946	345788719	dedicator of cytokinesis protein 9	0.0670621							42	356460868	60S ribosomal protein L32	0.768397
947	74000367	talin-2 isoform 1	0.0660016							43	57101324	60S ribosomal protein L18a isoform 1	0.766153
948	345807554	dedicator of cytokinesis protein 11 isoform 2	0.0612938							44	74007766	60S ribosomal protein L31-like isoform 1	0.734655
949	345776762	cadherin EGF LAG seven-pass G-type receptor 1	0.0594238							45	354622964	60S ribosomal protein L27	0.701323
950	73974204	E3 ubiquitin-protein ligase UBR5 isoform 1	0.0586681							46	345801679	60S ribosomal protein L5 isoform 1	0.657425
951	359323099	protein FAM186A	0.0576645							47	73946777	40S ribosomal protein S5 isoform 5	0.623686
952	345800903	hydrocephalus-inducing protein homolog	0.0562081							48	356460989	ribosomal protein S15a	0.571733
953	345788666	probable E3 ubiquitin-protein ligase MYCBP2 isoform 2	0.0348648							49	345786084	60S ribosomal protein L13a	0.553411
										50	356582345	60S ribosomal protein L37	0.537343
Rank	Accession	Ribosomal proteins identified with BL-Occludin	av n-PSM/OPN
1	345799858	40S ribosomal protein S25	2.68692
2	189339186	40S ribosomal protein S18	2.60626
3	57092109	60S ribosomal protein L35	2.56327
4	354622964	60S ribosomal protein L27	2.5097
5	345801364	60S ribosomal protein L23a-like isoform 1	2.47599
6	356991204	60S ribosomal protein L26	2.4515
7	73953669	40S ribosomal protein S14 isoform 3	2.0538
8	354459064	60S ribosomal protein L18	1.96055
9	345787852	40S ribosomal protein S13	1.90495
10	345785728	40S ribosomal protein S16	1.89821
11	354542533	60S ribosomal protein L12	1.88002
12	57109436	60S ribosomal protein L24 isoform 2	1.72752
13	356582345	60S ribosomal protein L37	1.58507
14	50978924	ribosome-binding protein 1	1.55572
15	73959105	ribosomal L1 domain-containing protein 1	1.53789
16	73994633	60S ribosomal protein L6 isoform 1	1.23436
17	354721202	40S ribosomal protein S10	1.20466
18	57113163	60S ribosomal protein L30 isoform 1	1.06472
19	345789107	60S ribosomal protein L15 isoform 4	1.0479
20	73974792	60S ribosomal protein L8 isoform 3	0.986993
21	356460868	60S ribosomal protein L32	0.981495
22	57092007	60S ribosomal protein L7a	0.964631
23	345800704	60S ribosomal protein L13	0.921722
24	356582337	60S ribosomal protein L7	0.919277
25	57112881	60S ribosomal protein L10 isoform 1	0.900918
26	345786707	60S ribosomal protein L36	0.893283
27	57098089	40S ribosomal protein S7 isoform 1	0.888288
28	73947567	40S ribosomal protein S9	0.885776
29	73946777	40S ribosomal protein S5 isoform 5	0.871763
30	57092393	40S ribosomal protein S26 isoform 1	0.846743
31	356460989	ribosomal protein S15a	0.843259
32	354725920	60S ribosomal protein L21	0.833701
33	356461025	60S ribosomal protein L3	0.776959
34	359318780	60S ribosomal protein L10-like	0.762175
35	345801679	60S ribosomal protein L5 isoform 1	0.742529
36	356991214	60S ribosomal protein L4	0.720324
37	356460872	40S ribosomal protein S6	0.717686
38	57109194	60S ribosomal protein L34 isoform 2	0.698062
39	345788799	60S ribosomal protein L13a-like	0.695636
40	57101324	60S ribosomal protein L18a isoform 1	0.690891
41	345784994	40S ribosomal protein S19	0.667135
42	345796306	60S ribosomal protein L27a-like	0.639263
43	345776672	60S ribosomal protein L17-like	0.635146
44	356991221	60S ribosomal protein L14	0.632341
45	345786873	60S ribosomal protein L29	0.595856
46	359806968	60S ribosomal protein L11 isoform 2	0.58859
47	354725914	40S ribosomal protein S4, X isoform	0.521761
48	73947970	40S ribosomal protein S11 isoform 3	0.500149
49	57102362	40S ribosomal protein S3 isoform 1	0.444833
50	345805448	60S ribosomal protein L19 isoform 4	0.369832

## Sheet: Sheet2
Accession	Ribosomal proteins identified with BL-Occludin	av n-PSM/OPN
345799858	40S ribosomal protein S25	2.68692
189339186	40S ribosomal protein S18	2.60626
57092109	60S ribosomal protein L35	2.56327
354622964	60S ribosomal protein L27	2.5097
345801364	60S ribosomal protein L23a-like isoform 1	2.47599
356991204	60S ribosomal protein L26	2.4515
73953669	40S ribosomal protein S14 isoform 3	2.0538
354459064	60S ribosomal protein L18	1.96055
345787852	40S ribosomal protein S13	1.90495
345785728	40S ribosomal protein S16	1.89821
354542533	60S ribosomal protein L12	1.88002
57109436	60S ribosomal protein L24 isoform 2	1.72752
356582345	60S ribosomal protein L37	1.58507
50978924	ribosome-binding protein 1	1.55572
73959105	ribosomal L1 domain-containing protein 1	1.53789
73994633	60S ribosomal protein L6 isoform 1	1.23436
354721202	40S ribosomal protein S10	1.20466
57113163	60S ribosomal protein L30 isoform 1	1.06472
345789107	60S ribosomal protein L15 isoform 4	1.0479
73974792	60S ribosomal protein L8 isoform 3	0.986993
356460868	60S ribosomal protein L32	0.981495
57092007	60S ribosomal protein L7a	0.964631
345800704	60S ribosomal protein L13	0.921722
356582337	60S ribosomal protein L7	0.919277
57112881	60S ribosomal protein L10 isoform 1	0.900918
345786707	60S ribosomal protein L36	0.893283
57098089	40S ribosomal protein S7 isoform 1	0.888288
73947567	40S ribosomal protein S9	0.885776
73946777	40S ribosomal protein S5 isoform 5	0.871763
57092393	40S ribosomal protein S26 isoform 1	0.846743
356460989	ribosomal protein S15a	0.843259
354725920	60S ribosomal protein L21	0.833701
356461025	60S ribosomal protein L3	0.776959
359318780	60S ribosomal protein L10-like	0.762175
345801679	60S ribosomal protein L5 isoform 1	0.742529
356991214	60S ribosomal protein L4	0.720324
356460872	40S ribosomal protein S6	0.717686
57109194	60S ribosomal protein L34 isoform 2	0.698062
345788799	60S ribosomal protein L13a-like	0.695636
57101324	60S ribosomal protein L18a isoform 1	0.690891
345784994	40S ribosomal protein S19	0.667135
345796306	60S ribosomal protein L27a-like	0.639263
345776672	60S ribosomal protein L17-like	0.635146
356991221	60S ribosomal protein L14	0.632341
345786873	60S ribosomal protein L29	0.595856
359806968	60S ribosomal protein L11 isoform 2	0.58859
354725914	40S ribosomal protein S4, X isoform	0.521761
73947970	40S ribosomal protein S11 isoform 3	0.500149
57102362	40S ribosomal protein S3 isoform 1	0.444833
345805448	60S ribosomal protein L19 isoform 4	0.369832
